# Supplementary material for: Tomosyns attenuate SNARE assembly and synaptic depression by binding to VAMP2-containing template complexes
Source: PubMed Central journal article supplement (PMC10965968; doi:10.1038/s41467-024-46828-1), 2024-03-26
Supplement: 41467_2024_46828_MOESM1_ESM.pdf [file 41467_2024_46828_MOESM1_ESM.pdf]

## Supplementary Information

### **Tomosyns attenuate SNARE assembly and synaptic depression by binding to VAMP2-containing template complexes**

Marieke Meijer<sup>1, 5</sup>, Miriam Öttl<sup>2, 5</sup>, Jie Yang<sup>3, 5</sup>, Aygul Subkhangulova<sup>2</sup>, Avinash Kumar<sup>3</sup>, Zicheng Feng<sup>3</sup>, Torben W. van Voorst<sup>2</sup>, Alexander J. Groffen<sup>1</sup>, Jan R.T. van Weering<sup>1</sup>, Yongli Zhang<sup>3, 4, 6, \*</sup> and Matthijs Verhage<sup>1, 2, 6, \*</sup>

<sup>1</sup> Department of Human Genetics, Center for Neurogenomics and Cognitive Research, Amsterdam University Medical Center, 1081HV Amsterdam, The Netherlands

<sup>2</sup> Department of Functional Genomics, Center for Neurogenomics and Cognitive Research, Vrije Universiteit Amsterdam, 1081HV Amsterdam, The Netherlands

<sup>3</sup> Department of Cell Biology, Yale School of Medicine, New Haven, CT 06511, USA

<sup>4</sup> Department of Molecular Biophysics and Biochemistry, Yale University, New Haven, CT 06511, USA

<sup>5</sup> These authors contributed equally: Marieke Meijer, Miriam Öttl, Jie Yang

<sup>6</sup> These authors jointly supervised this work: Yongli Zhang, Matthijs Verhage

\*Correspondence: [m.meijer@vu.nl](mailto:m.meijer@vu.nl) (M.M.), [jie.yang.jy546@yale.edu](mailto:jie.yang.jy546@yale.edu) (J.Y.), [Yongli.zhang@yale.edu](mailto:Yongli.zhang@yale.edu) (Y.Z), [m.verhage@vu.nl](mailto:m.verhage@vu.nl) (M.V.)

**Supplementary Fig. 1**

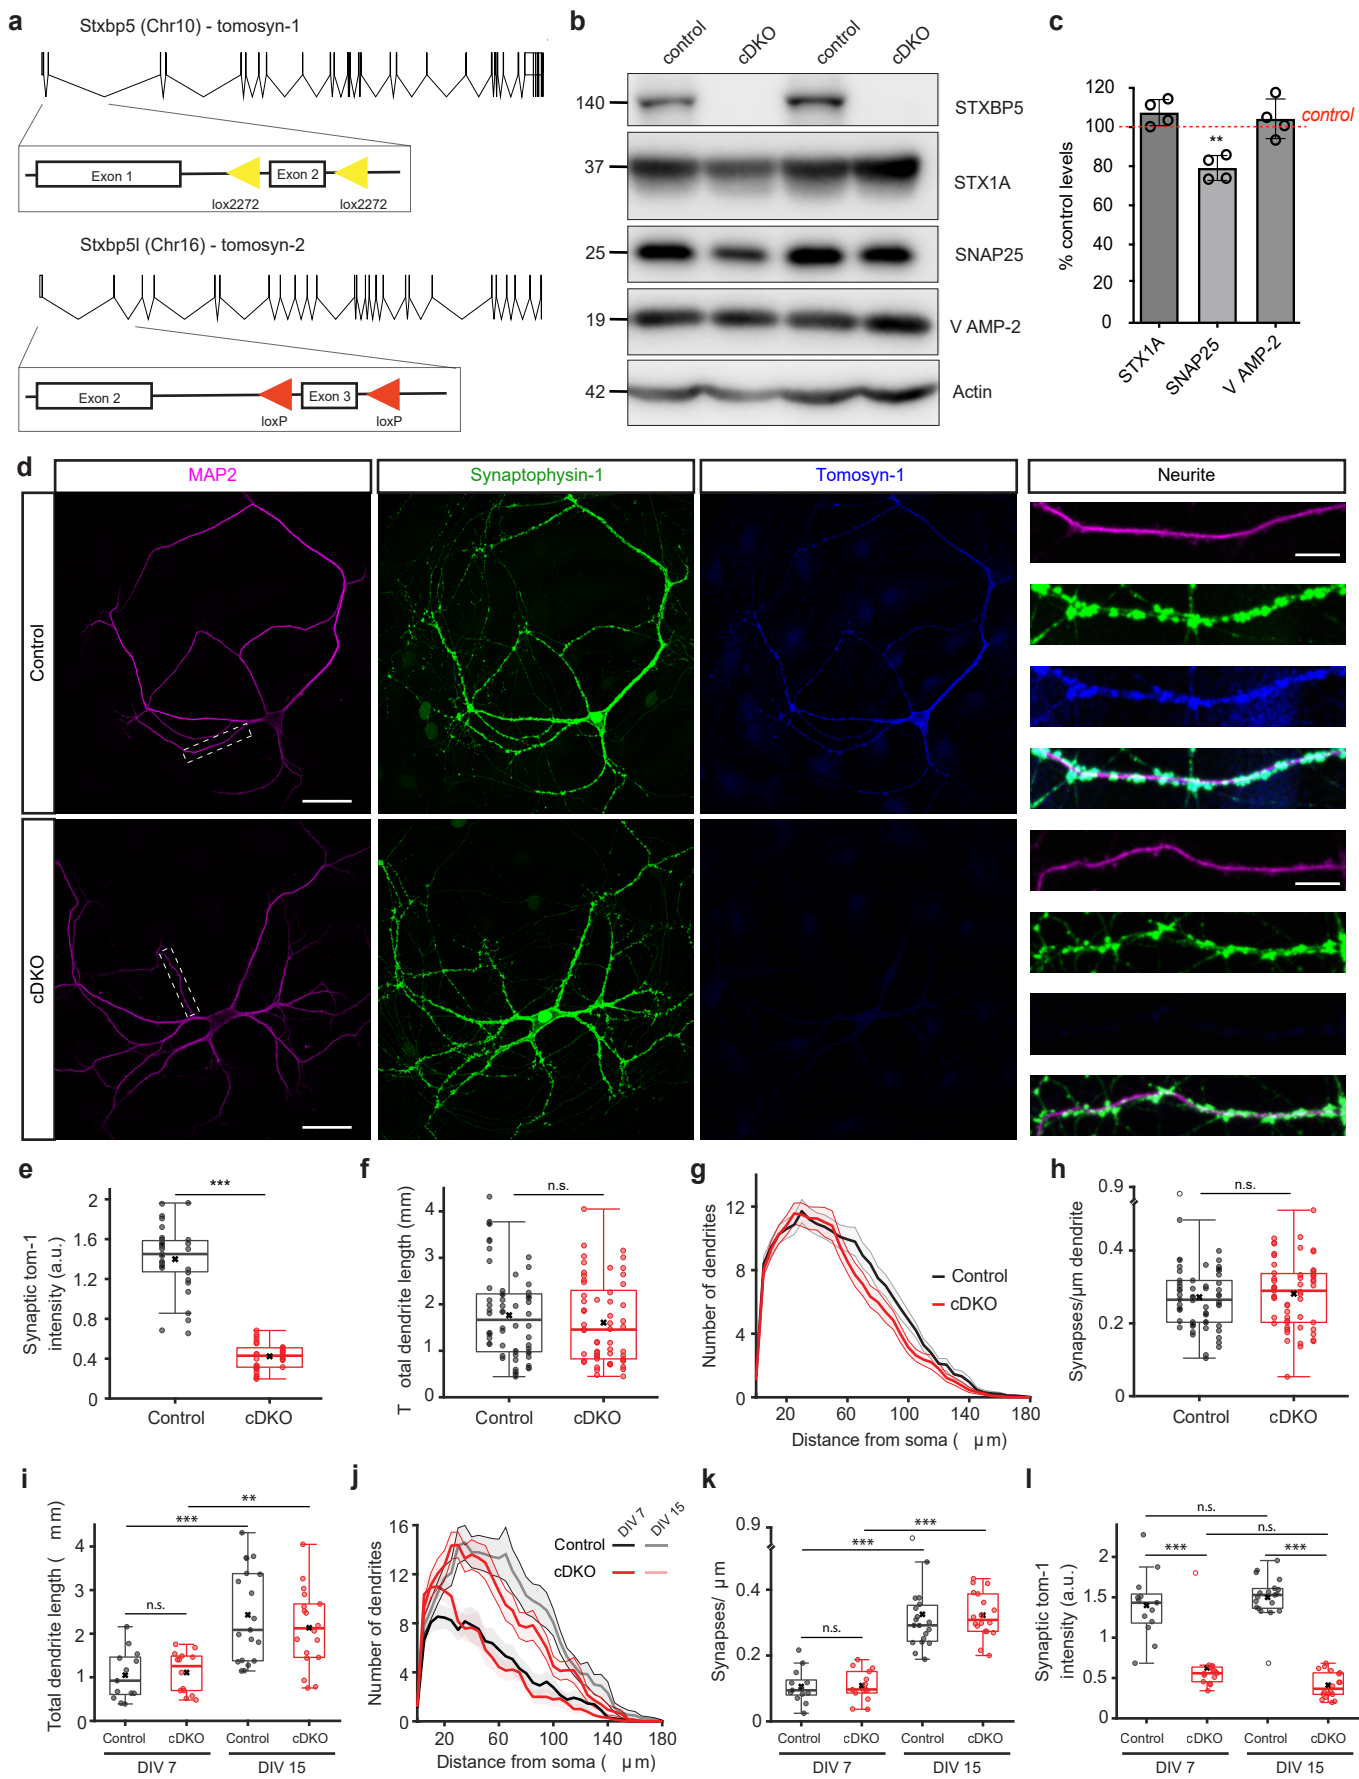

Supplementary Figure 1. **A novel conditional KO mouse for both tomosyn paralogs.** **a** Structures of the tomosyn-1 and tomosyn-2 genes. Zoom-ins to early exons show floxed regions around exon 2 of tomosyn-1 and exon 3 of tomosyn-2. **b** Example Western blot showing loss of tomosyn-1 (STXBP5) and levels of synaptic SNAREs in cDKO high-density neuronal cultures. Numbers on the left indicate approximate molecular weight of the detected bands in kDa. **c** Quantification of synaptic SNAREs expression from Western blots exemplified in **b**. cDKO levels were normalized to control levels in the corresponding culture after normalizing to actin. N = 4 independent cultures. Open circles denote the average of 3 technical replicates per culture. Bars show means of biological replicates  $\pm$  SD. Data were analyzed using one sample t-test.  $**p < .01$ . **d** Example images of autaptic hippocampal neurons immunostained for MAP2 as a dendrite marker, synaptophysin-1 as a synapse marker, and tomosyn-1 (scale bar = 50  $\mu$ m). Dashed boxes in MAP2 images correspond to dendrite zoom-ins on the right. Dendrite zoom-ins show synaptic localization of tomosyn-1 and loss of expression in cDKO neurons (scale bar = 10  $\mu$ m). **e-h** Quantifications from images shown in **d**. **e** Loss of tomosyn expression in synapses was confirmed by measuring the intensity of the tomosyn-1 signal within synaptophysin-1 puncta in cDKO (n = 30/2) and control (n = 31/2) neurons;  $***p < .0001$ . **f** Total dendritic length was determined by tracing of the MAP2 signal. Control n = 62/4, cDKO n = 57/4;  $p = 0.295$ . **g** Sholl plot showing similar dendritic complexity of both genotypes. **h** Synapse density was determined by the number of synaptophysin-1-positive puncta within one  $\mu$ m dendrite. Control n = 62/4, cDKO n = 57/4;  $p = 0.2035$ . **i-k** Morphological analysis from immunostainings at day in vitro (DIV) 7 and 15 shows similar morphology of both groups throughout development. DIV7: control n = 13/1, cDKO n = 14/1; DIV15: control n = 19/1, cDKO n = 18/1. **i** Total neurite length derived from MAP2 tracing;  $p = 0.7628$  (DIV7: WT vs cDKO),  $***p = 0.0002$  (WT: DIV7 vs DIV15),  $p = 0.3685$  (DIV15: WT vs cDKO),  $***p = 0.0005$  (cDKO: DIV7 vs DIV15). **j** Sholl plot of dendrites. **k** Synapse density was determined from synaptophysin-1-positive puncta within one  $\mu$ m dendrite;  $p = 0.8865$  (DIV7: WT vs cDKO),  $***p < 0.0001$  (WT: DIV7 vs DIV15),  $p = 0.2869$  (DIV15: WT vs cDKO),  $***p < 0.0001$  (cDKO: DIV7 vs DIV15). **l** Signal intensity of tomosyn-1 in synaptophysin-positive puncta confirms loss of tomosyn at both DIV7 and DIV15;  $***p < 0.0001$  (DIV7: WT vs cDKO),  $p = 0.1895$  (WT: DIV7 vs DIV15),  $***p < 0.0001$  (DIV15: WT vs cDKO),  $p = 0.0215$  (cDKO: DIV7 vs DIV15).

N = cells/independent cultures, unless stated otherwise. In **e**, **f**, **h**, **l**, **k** and **l**, boxplots display median (center), upper and lower quartiles (box bounds) and whiskers to the last datapoint within 1.5x interquartile range. In **g** and **j**, data are presented as mean  $\pm$  SEM. A one-way ANOVA tested the significance of adding experimental group as a predictor, see Supplementary Table 1. When applicable, p-value thresholds ( $* < 0.05$ ;  $** < 0.01$ ;  $*** < 0.001$ ) were adjusted with a Bonferroni correction ( $\alpha$ /number of tests). Abbreviations: n.s. (not significant); DIV (day in vitro). Source data are provided as a Source Data file.

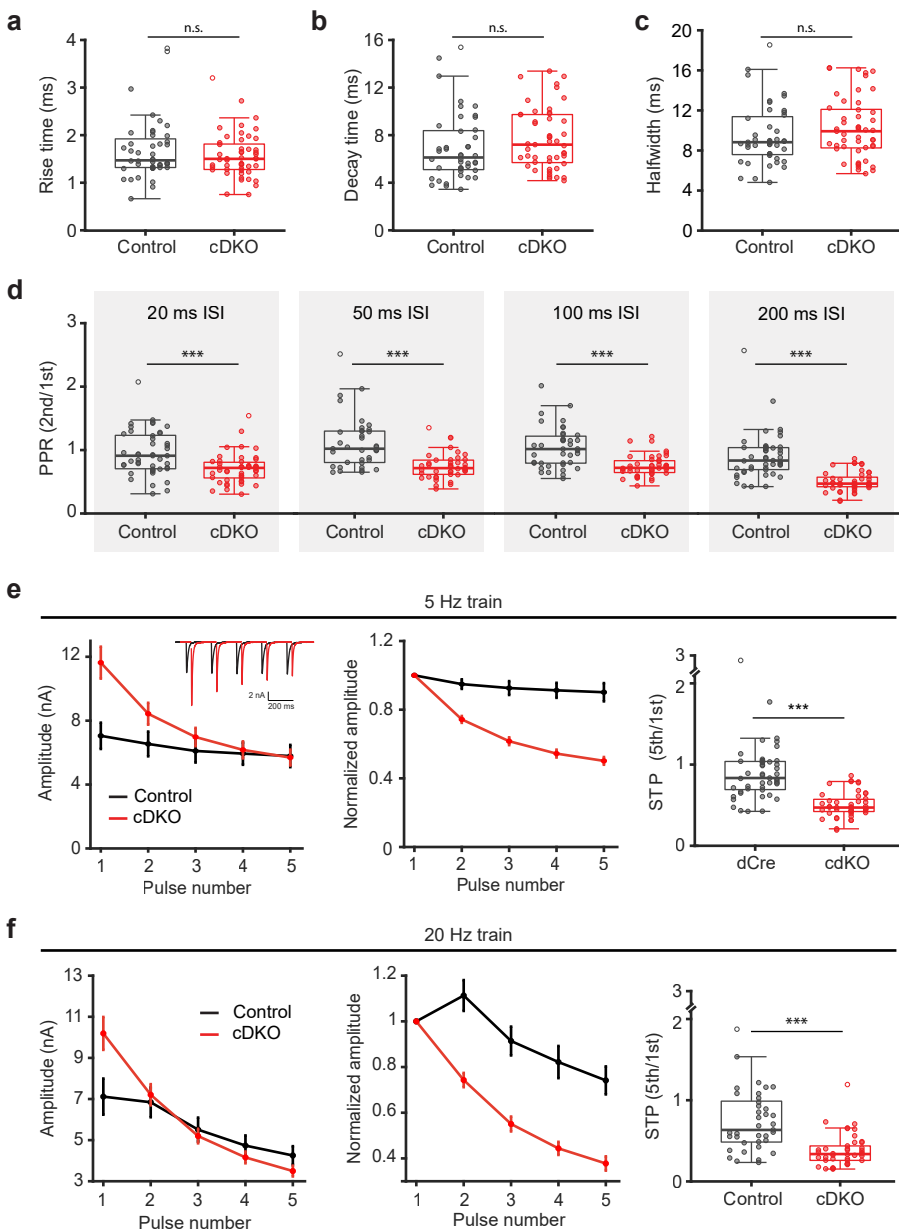

Supplementary Figure 2. **Normal EPSC kinetics and more quantifications of release probability and short-term plasticity.** **a-c** Analysis of the kinetics of single EPSCs. Control  $n = 44/6$ , cDKO  $n = 49/6$ . **a** 20 – 80% rise time;  $p = 0.7124$ . **b** 100 – 50% decay time;  $p = 0.0602$ . **c** EPSC width at half maximum;  $p = 0.0907$ . **d** Paired-pulse ratios at different inter-pulse intervals. Same data as in Fig. 1 g. 20 ms IPI: control  $n = 45/6$ , cDKO  $n = 47/6$ ; \*\*\* $p < 0.0001$ . 50 ms IPI: control  $n = 37/6$ , cDKO  $n = 42/6$ ; \*\*\* $p < 0.0001$ . 100 ms IPI: control  $n = 39/6$ , cDKO  $n = 44/6$ ; \*\*\* $p < 0.0001$ . 200 ms IPI: control  $n = 47/6$ , cDKO  $n = 47/6$ ; \*\*\* $p < 0.0001$ . **e** Same analysis as in Fig. 1 h-k but for a 5 Hz train of 5 pulses. The rundown of the absolute (left) and normalized (center) amplitude were plotted and the ratio of the fifth over the first amplitude was calculated (right) to quantify short-term plasticity. Control  $n = 39/6$ , cDKO  $n = 44/6$ ; \*\*\* $p < 0.0001$ . **f** Same as in e but for a 20 Hz train. Control  $n = 39/6$ , cDKO  $n = 42/6$ ; \*\*\* $p < 0.0001$ .

$N =$  cells/independent cultures. In **a-f**, boxplots display median (center), upper and lower quartiles (box bounds) and whiskers to the last datapoint within 1.5x interquartile range. In left and center plots in **e** and **f**, data are presented as mean  $\pm$  SEM. A one-way ANOVA tested the significance of adding experimental group as a predictor, see Supplementary Table 1. Abbreviations: n.s. (not significant). Source data are provided as a Source Data file.

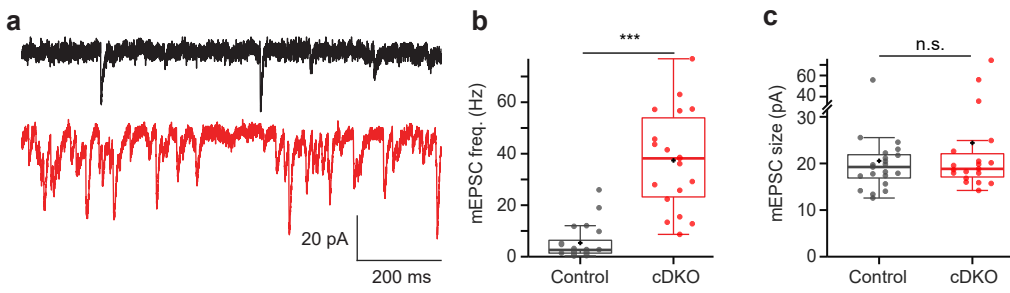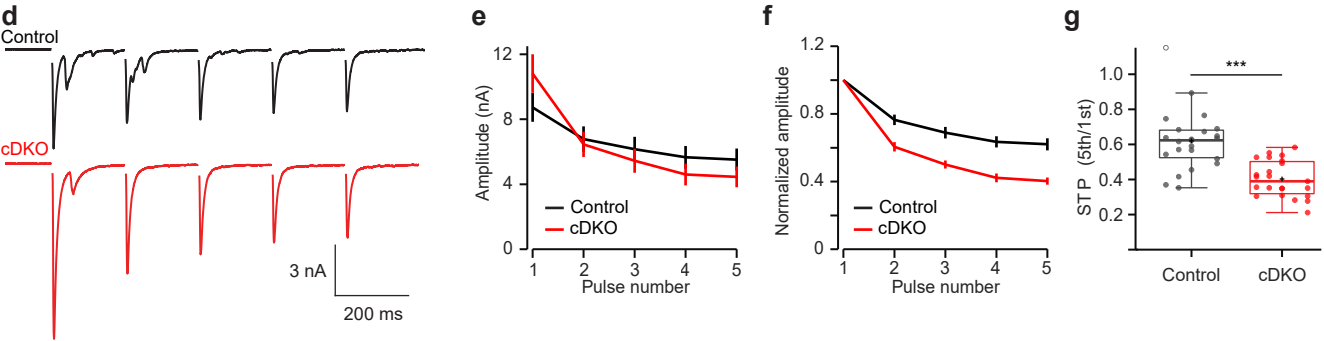

Supplemental Figure 3. **Tomosyn cDKO neurons in micro-networks enhances the release probability of spontaneous and evoked release.** **a-c** Analysis of spontaneous vesicle release in micro-networks of hippocampal neurons. Control  $n = 21/4$ , cDKO  $n = 19/4$ . **a** Example traces of miniature EPSCs (mEPSCs). **b** The frequency of mEPSCs; \*\*\* $p < 0.0001$ . **c** mEPSC amplitude;  $p = 0.2802$ . **d-g** Analysis of evoked synaptic transmission in micro-networks of hippocampal neurons. Control  $n = 23/5$ , cDKO  $n = 23/5$ . **d** Example traces of EPSCs evoked by local field stimulation (5 pulses at 5 Hz). **e** Amplitudes of EPSCs. **f** Amplitudes of EPSCs normalized to the first pulse. **g** STP quantified by the ratio of the fifth pulse over the first pulse; \*\*\* $p < 0.0001$ .

$N = \text{cells/independent cultures}$ . In **b**, **c** and **g**, boxplots display median (center), upper and lower quartiles (box bounds) and whiskers to the last datapoint within 1.5x interquartile range. In **e** and **f**, data are presented as mean  $\pm$  SEM. A one-way ANOVA tested the significance of adding experimental group as a predictor, see Supplementary Table 1. Abbreviations: n.s. (not significant). Source data are provided as a Source Data file.

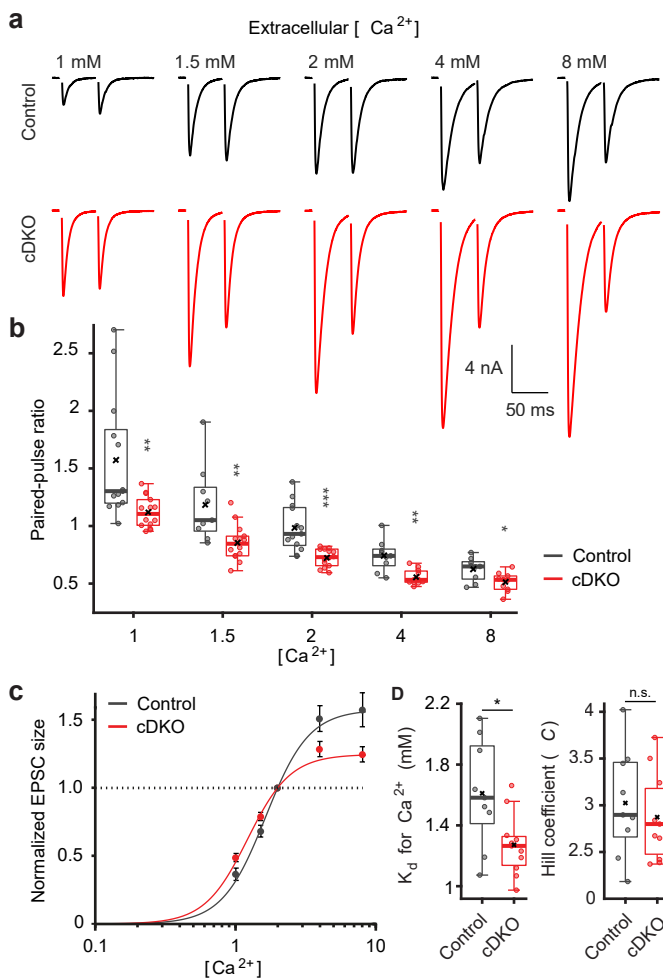

**Supplementary Fig. 4. Tomosyns increase the calcium affinity of the release machinery. a-b** Autaptic hippocampal neurons were stimulated with paired pulses of 50 ms intervals at different extracellular calcium concentrations. Control  $n = 9 - 13/4$ , cDKO  $n = 10 - 14/4$ . **a** Example traces. **b** The paired-pulse ratio (PPR) was calculated by dividing the amplitude of the second pulse by the amplitude of the first pulse. 1mM: control  $n = 13/4$ , cDKO  $n = 14/4$ ,  $**p=0.0052$ ; 1.5mM: control  $n = 9/4$ , cDKO  $n = 14/4$ ,  $**p=0.0086$ ; 2mM: control  $n = 13/4$ , cDKO  $n = 14/4$ ,  $***p=0.0002$ ; 4mM: control  $n = 9/4$ , cDKO  $n = 11/4$ ,  $**p=0.0028$ ; 8mM: control  $n = 9/4$ , cDKO  $n = 10/4$ ,  $*p=0.0288$ . **c** Concentration-response curves of the 1st EPSC amplitudes from data in a-b, normalized to responses in standard 2 mM [Ca<sup>2+</sup>]. **d** A Hill function was fitted to the data shown in **c** from which the dissociation constant (K<sub>d</sub>) for calcium (left) and the Hill coefficient (right) were calculated. Control  $n = 9/4$ , cDKO  $n = 11/4$ ;  $*p=0.0193$  (K<sub>d</sub>);  $p=0.7792$  (Hill coefficient).

N = cells/independent cultures. In **b** and **d**, boxplots display median (center), upper and lower quartiles (box bounds) and whiskers to the last datapoint within 1.5x interquartile range. In **c**, data are presented as mean  $\pm$  SEM. A one-way ANOVA tested the significance of adding experimental group as a predictor, see Supplementary Table 1. Abbreviations: n.s. (not significant). Source data are provided as a Source Data file.

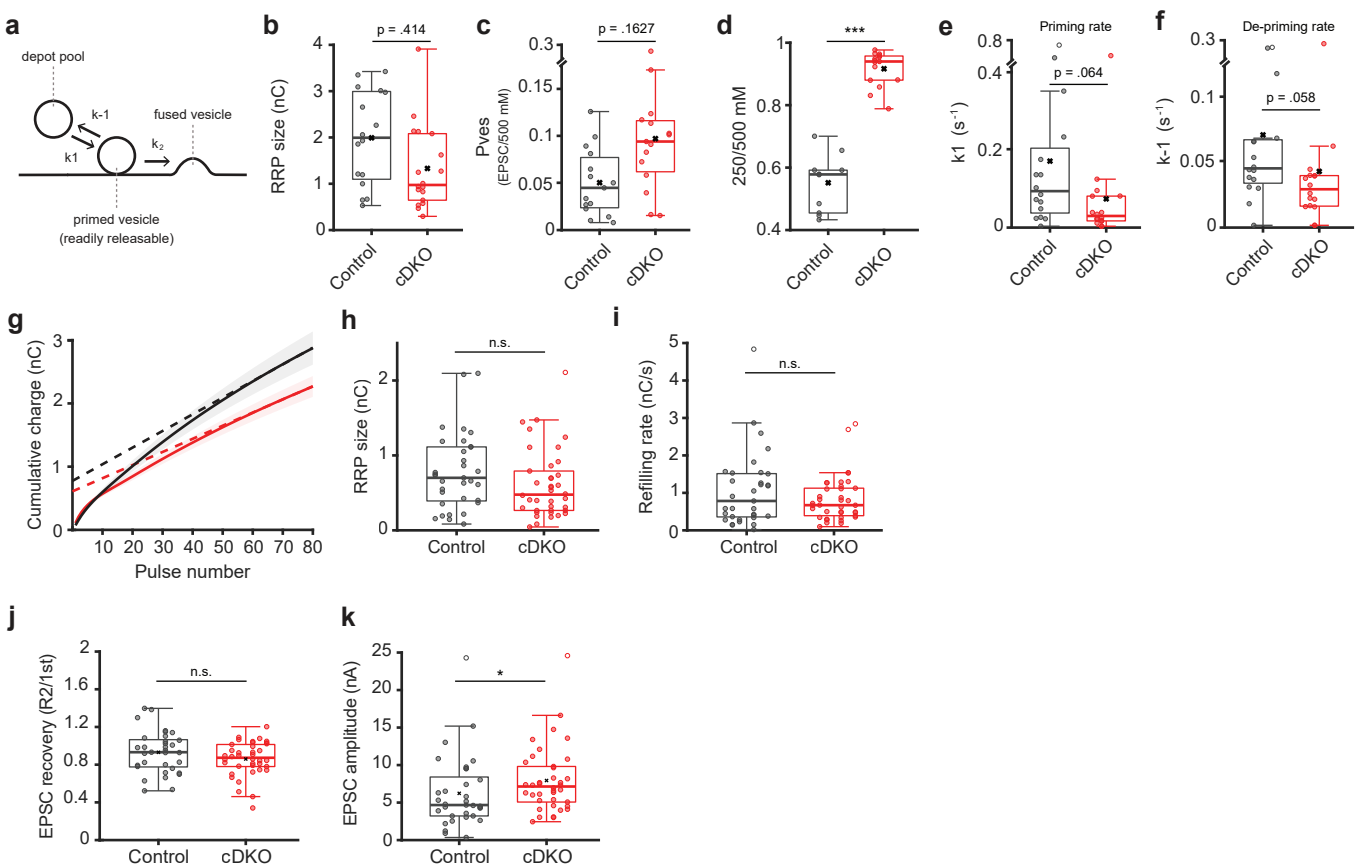

**Supplementary Figure 5. Fitting of an energy barrier model yields similar results as manual analysis of sucrose traces.** **a** Illustration of the minimal vesicle state model. Vesicles first start out in a depot pool of vesicles from which they transition to a primed state at a priming rate  $k_1$ . De-priming occurs at a rate of  $k_{-1}$ . Primed vesicles will fuse with a rate  $k_2$ . **b** RRP size as estimated from the fitted data. Control  $n = 16/6$ , cDKO  $n = 18/6$ . **c** Pves calculated as the ratio of the charge released by a single EPSC to the fitted RRP. Control  $n = 15/6$ , cDKO  $n = 15/6$ . **d** The fraction of the RRP released by the submaximal sucrose concentration as calculated from the fitted data. Control  $n = 10/6$ , cDKO  $n = 15/6$ ; \*\*\* $p < 0.0001$ . **e** Priming and **f** de-priming rates during the 500 mM sucrose application, derived from the fitting. Control  $n = 16/6$ , cDKO  $n = 16/6$ . **g** Neurons were stimulated with 80 action potentials at 40 Hz (see Fig. 2g). The cumulative charge released during the train was plotted and a line was drawn through the last 20 pulses to back-extrapolate to the y-intercept, which marks the estimate for the RRP (readily releasable pool) size. **h** RRP size as calculated by back-extrapolation shown in **g**. Control  $n = 33/6$ , cDKO  $n = 38/6$ ;  $p = 0.1090$ . **i** The refilling rate of vesicles during the pulse is estimated from the slope of the back-extrapolation line shown in **g**. Control  $n = 33/6$ , cDKO  $n = 38/6$ ;  $p = 0.1419$ . **j** The amplitude of recovery pulse R2 (see Fig. 2 g) was divided by the first amplitude of the train. Control  $n = 31/6$ , cDKO  $n = 35/6$ ;  $p = 0.1933$ . **k** The absolute amplitude of recovery pulse R2. Control  $n = 31/6$ , cDKO  $n = 35/6$ ; \* $p = 0.0316$ .

$N =$  cells/independent cultures. In **b-f** and **h-k**, boxplots display median (center), upper and lower quartiles (box bounds) and whiskers to the last datapoint within 1.5x interquartile range. In **g**, data are presented as mean  $\pm$  SEM (shaded area). A one-way ANOVA tested the significance of adding experimental group as a predictor, see Supplementary Table 1. Source data are provided as a Source Data file.

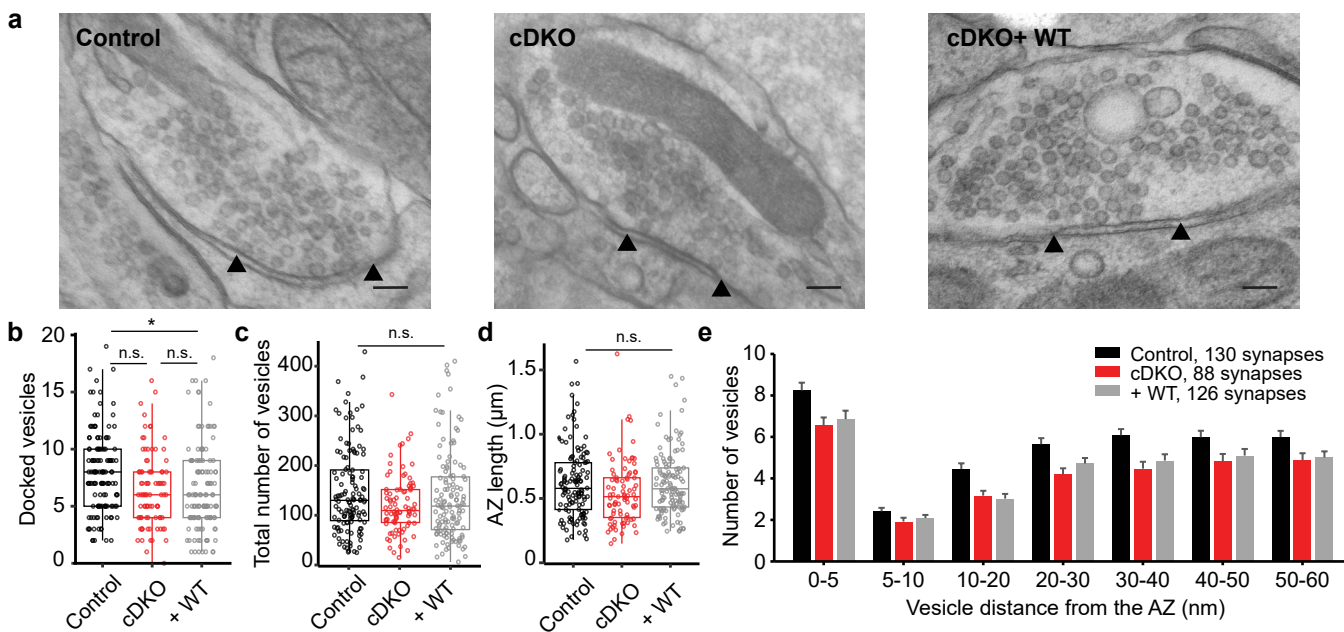

**Supplementary Figure 6. Loss of tomosyns does not increase vesicle docking.**

**a-e** High-pressure freeze electron microscopy was performed on micro-networks of control ( $n = 132$  synapses / 4 sapphires), cDKO ( $n = 89$  synapses/ 4 sapphires), and cDKO neurons expressing tomosyn-1m (+WT;  $n = 128$  synapses/ 4 sapphires). **a** Example images. Edges of the active zone region on the presynaptic membrane are indicated by arrowheads. Scale bar = 100 nm. **b** No significant difference between control and cDKO synapses is detected, but the number of docked vesicles is reduced in + WT synapses compared to control.  $p=0.0424$  (control vs cDKO);  $*p=0.0153$  (control vs +WT),  $p=0.804$  (cDKO vs +WT). **c** The total number of synaptic vesicles ( $p=0.3097$ ) and **d** the length of the active zone ( $p=0.2044$ ) in the cross section is normal in all groups. **e** The distribution of vesicles proximal to the active zone is normal in all groups.

A one-way ANOVA tested the significance of adding experimental group as a predictor, see Supplementary Table 1. Abbreviations: n.s. (not significant). Source data are provided as a Source Data file.



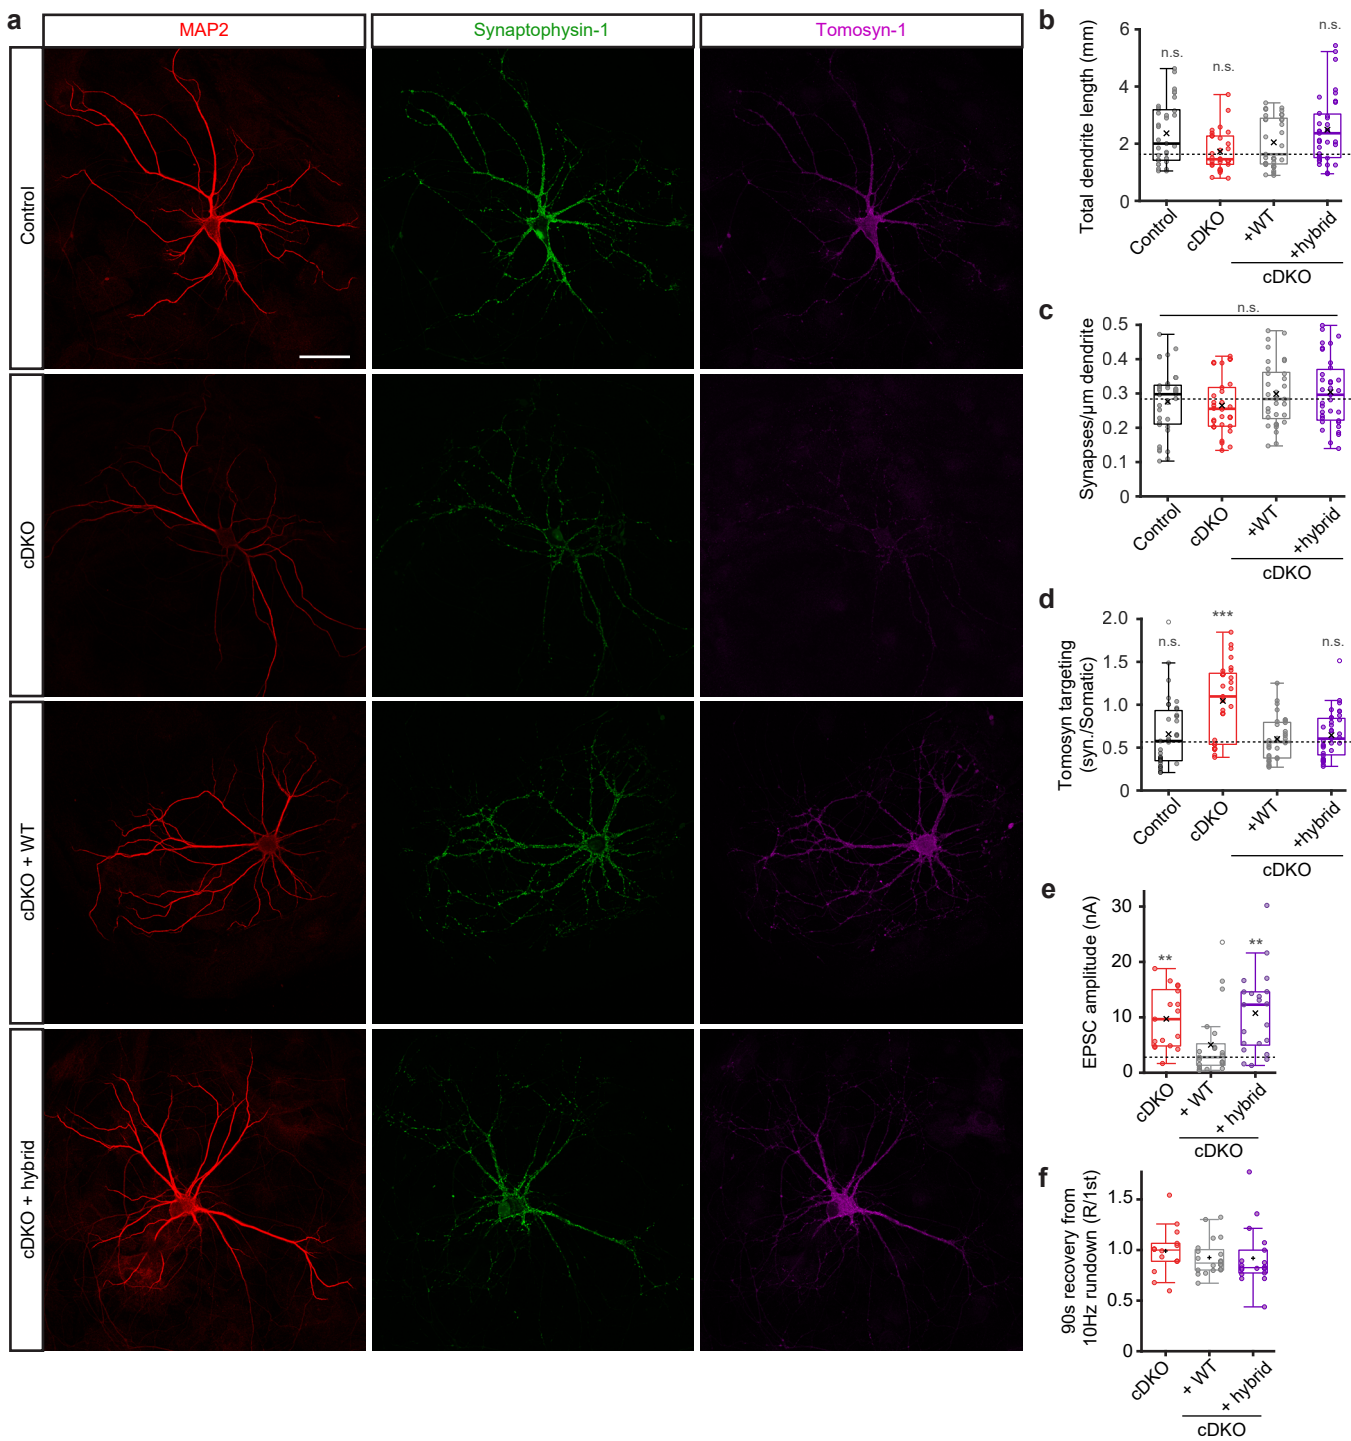

Supplementary Figure 7. **The tomosyn-VAMP2 hybrid is properly targeted to synapses.** **a-d** Morphological analysis of neurons infected with wild-type tomosyn or hybrid tomosyn (see Fig. 3). Control n = 35/3, cDKO n = 30/3, + WT n = 33/3, + Hybrid n = 35/3. **a** Example images of autaptic hippocampal neurons immunostained for MAP2, synaptophysin-1, and tomosyn-1. Scale bar = 50  $\mu$ m. **b** Total dendrite length as derived from the MAP2 mask;  $p=0.0622$  (control vs +WT);  $p=0.0826$  (cDKO vs +WT),  $p=0.0354$  (+hybrid vs +WT). **c** Synapse density as derived from the synaptophysin-1-positive puncta within the MAP2 mask;  $p=0.2991$  (all groups). **d** The ratio of the tomosyn-1 signal intensity in synapses to the signal in the soma was calculated to demonstrate synaptic targeting;  $p=0.2934$  (control vs +WT);  $***p<0.0001$  (cDKO vs +WT),  $p=0.3730$  (+hybrid vs +WT). **e** Absolute EPSC amplitudes. cDKO n = 17/4, + WT n = 21/4, + Hybrid n = 21/4;  $**p=0.00137$  (cDKO vs +WT),  $**p=0.00147$  (+hybrid vs +WT). **f** EPSC amplitude measured 90 seconds after STP protocol (5 pulses at 10Hz) normalized to initial EPSC amplitude (1<sup>st</sup> pulse 10Hz train). cDKO n = 14/4, + WT n = 20/4, + Hybrid n = 18/4.

N = cells/independent cultures. In **b-f**, boxplots display median (center), upper and lower quartiles (box bounds) and whiskers to the last datapoint within 1.5x interquartile range. A one-way ANOVA tested the significance of adding experimental group as a predictor, see Supplementary Table 1. For post-hoc comparison to + WT group, p-value thresholds ( $*<0.05$ ;  $**<0.01$ ;  $***<0.001$ ) were adjusted with a Bonferroni correction ( $\alpha$ /number of tests). Grey asterisks show comparison to + WT group. Abbreviations: n.s. (not significant). Source data are provided as a Source Data file.

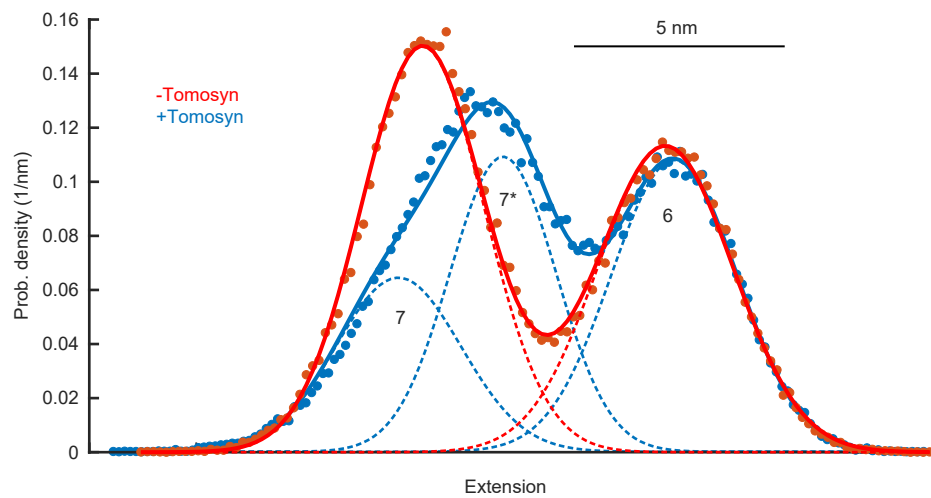

Supplementary Figure 8. **The probability density functions (PDFs) of the time-dependent extensions at constant forces revealed an intermediate state induced by the tomosyn SNARE motif (state 7\*).** The PDFs can be well fitted by a sum of two Gaussian functions in the absence of the tomosyn SNARE motif and three Gaussian functions when present. The three peaks represent the template complex (state 7), the tomosyn-bound template complex (state 7\*), and the Munc18-1-bound open syntaxin (Fig. 5 c).

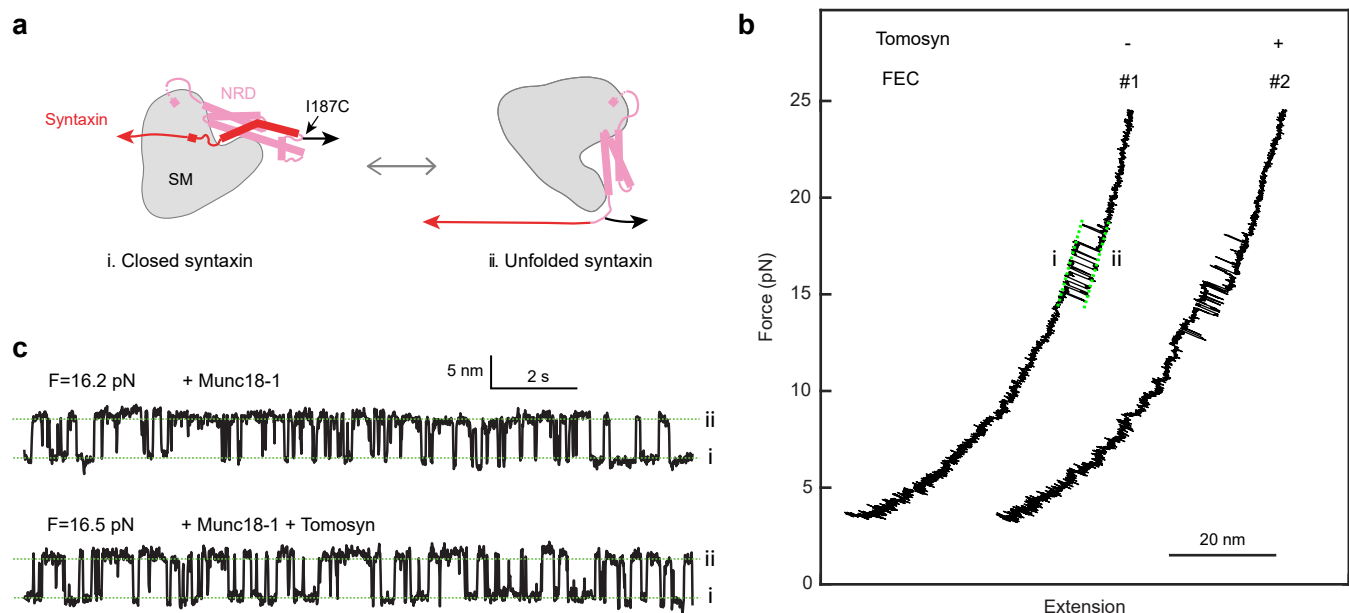

Supplementary Figure 9. **The tomosyn SNARE motif does not affect the folding of Munc18-1-bound closed syntaxin-1.** **a** Schematic diagrams of Munc18-1-bound closed syntaxin (i) and unfolded SNARE motif (ii). Note that the syntaxin-1 molecule was pulled from its C-terminus and I187C to which a DNA handle was attached. **b** Force-extension curves obtained by pulling Munc18-1 bound syntaxin-1 in the absence or presence of 2  $\mu\text{M}$  tomosyn SNARE motif in the solution. **c** Extension-time trajectories at constant forces showing reversible unfolding and refolding of the Munc18-1-bound syntaxin. Abbreviations: N-terminal regulatory domain (NRD).

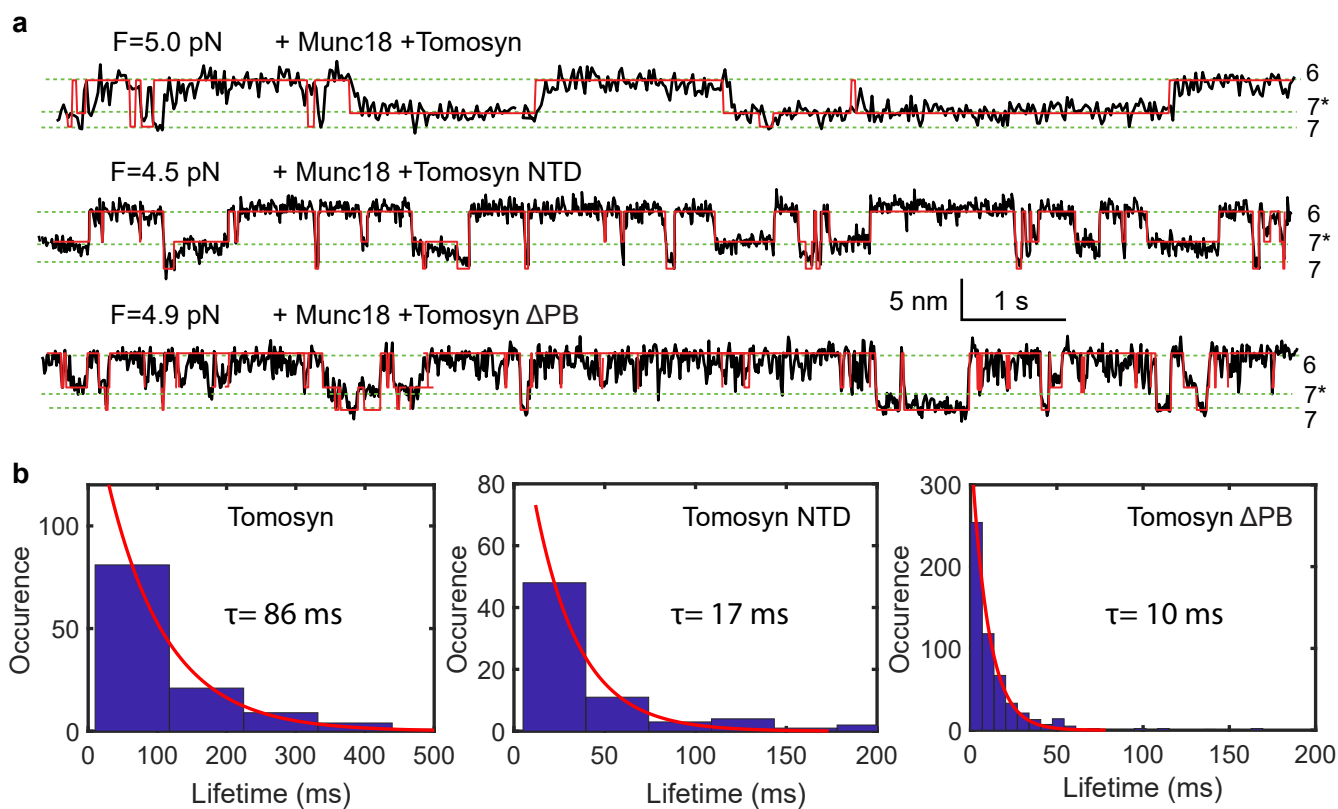

Supplementary Figure 10. **Reduced lifetimes of the tomosyn-bound template complex state due to tomosyn truncation.** **a** Closed-up views of the extension trajectories (black) containing the tomosyn-bound template complex state shown in Fig. 6a. **b** Histograms of the dwell time of the tomosyn-bound template complex. The whole trajectories span 40 s–90 s and were first analyzed by three-state hidden-Markov modeling. Then, the idealized state transitions (red traces in a) were derived by the Viterbi algorithm. Finally, the states corresponding to the tomosyn-bound template complex state (state 7\*) were extracted and their dwell times were calculated for the histogram distributions. The distributions were fit with a single exponential function (red curves) to derive the average lifetimes ( $\tau$ ) indicated.

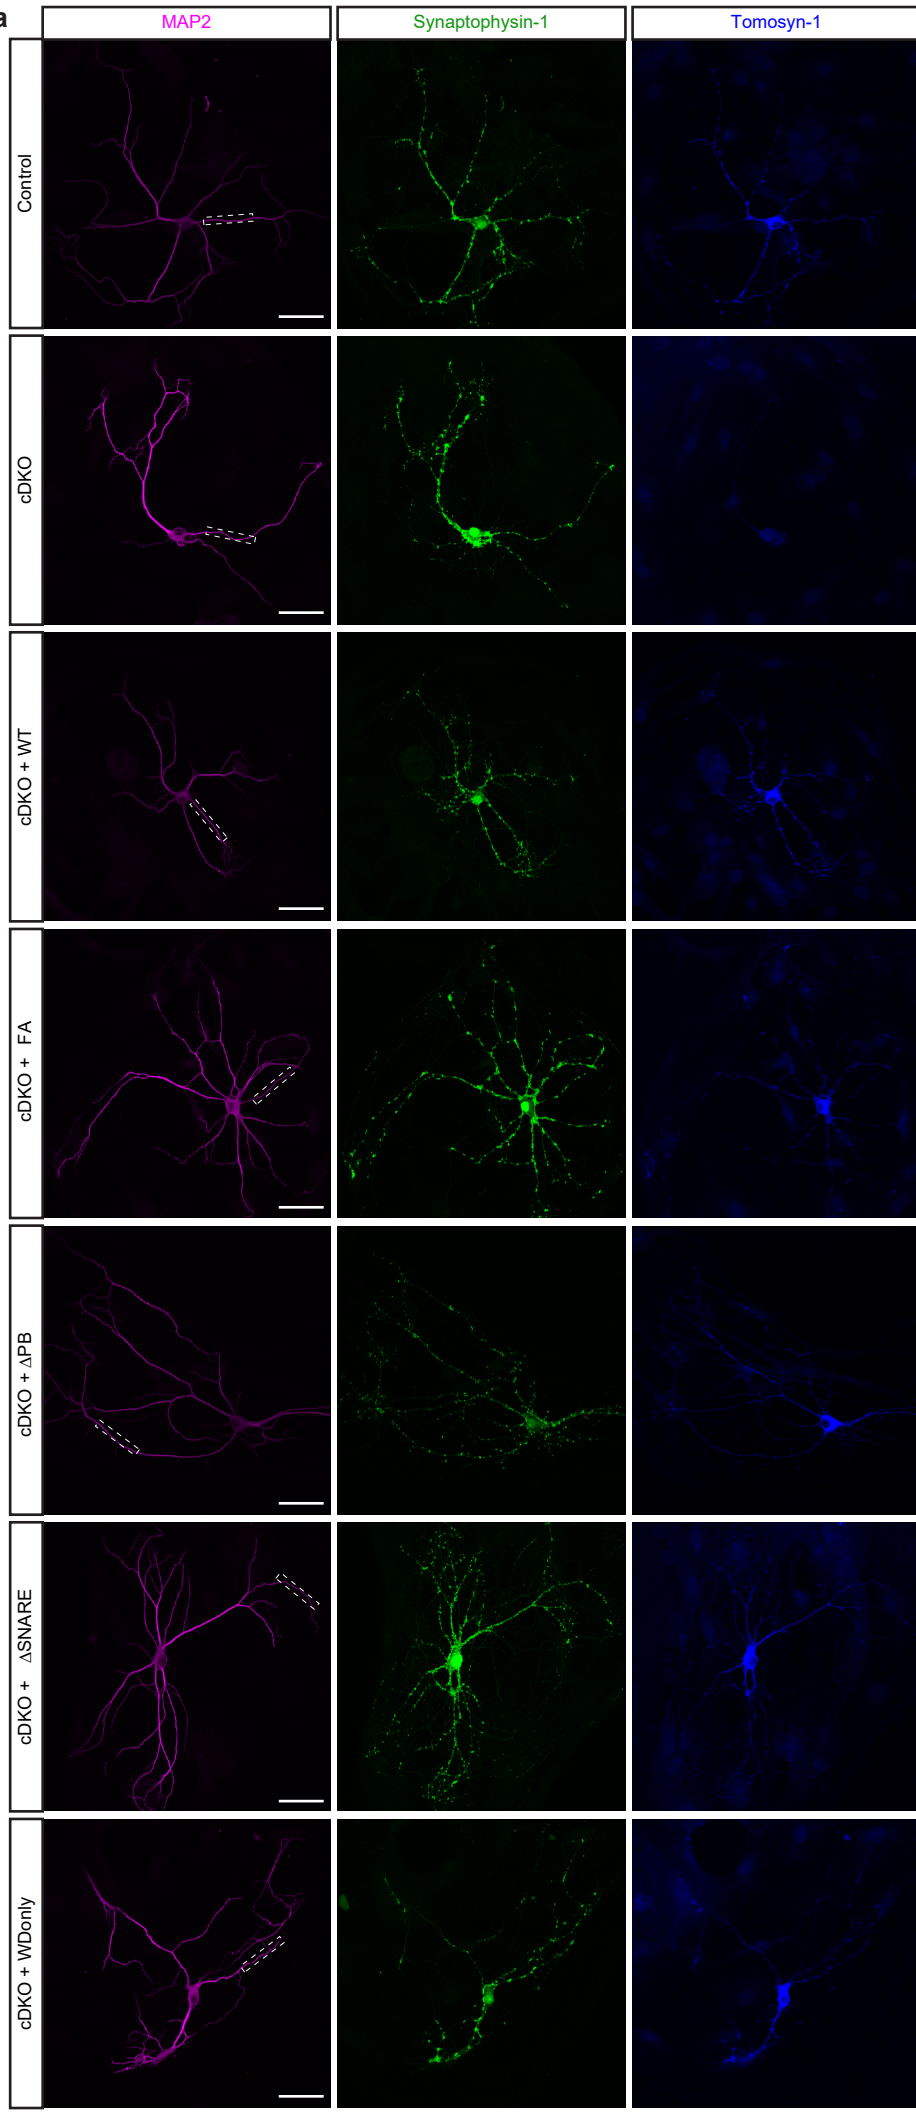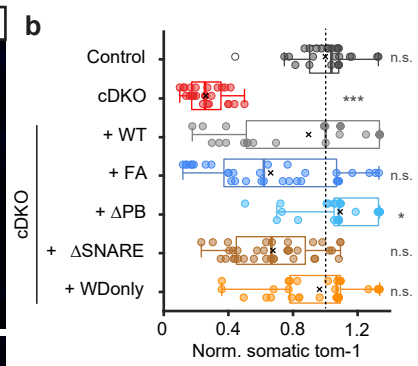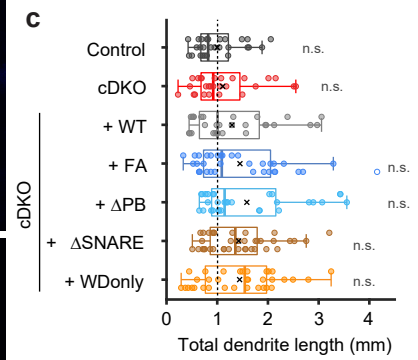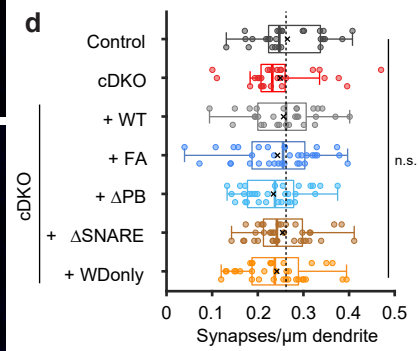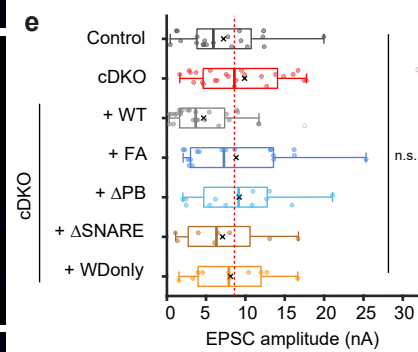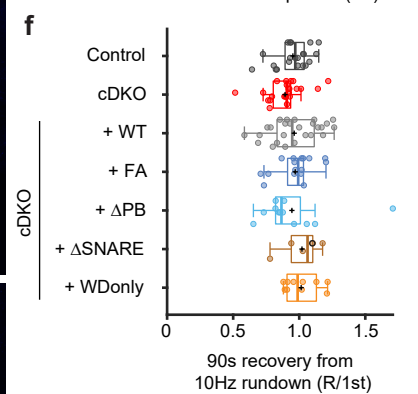

**Supplementary Fig. 11**

Supplementary Figure 11. **SNARE-truncating constructs support neuronal morphology.** **a-d** Morphological analysis of neurons infected with different mutant constructs (see Fig. 5). Control n = 26 – 27/3, cDKO n = 27/3, + WT n = 29/3, + FA n = 33 – 34/3, +  $\Delta$ PB n = 30 – 31/3, +  $\Delta$ SNARE n = 36 – 38/3, + WOnly n = 34/3. **a** Example images of autaptic hippocampal neurons immunostained for MAP2, synaptophysin-1, and tomosyn-1. Dashed boxes correspond to dendrite zoom-ins in Fig. 6 f. Scale bar = 50  $\mu$ m. **b** Somatic intensity of tomosyn-1 normalized to controls. Control n = 26/3, cDKO n = 27/3, + WT n = 29/3, + FA n = 33/3, +  $\Delta$ PB n = 30/3, +  $\Delta$ SNARE n = 36/3, + WOnly n = 34/3. Post hoc comparisons against +WT:  $p=0.1271$  (control); \*\*\* $p<0.0001$  (cDKO),  $p=0.00927$  (+FA), \* $p=0.00492$  (+ $\Delta$ PB),  $p=0.009623$  (+ $\Delta$ SNARE),  $p=0.1967$  (+WOnly). **c** Total dendrite length as derived from the MAP2 mask. Control n = 27/3, cDKO n = 27/3, + WT n = 29/3, + FA n = 34/3, +  $\Delta$ PB n = 31/3, +  $\Delta$ SNARE n = 38/3, + WOnly n = 34/3. Post hoc comparisons against +WT:  $p=0.0567$  (control);  $p=0.2442$  (cDKO),  $p=0.6569$  (+FA),  $p=0.1724$  (+ $\Delta$ PB),  $p=0.2624$  (+ $\Delta$ SNARE),  $p=0.2592$  (+WOnly). **d** Synapse density as derived from the synaptophysin-1-positive puncta within the MAP2 mask. Control n = 27/3, cDKO n = 27/3, + WT n = 29/3, + FA n = 34/3, +  $\Delta$ PB n = 31/3, +  $\Delta$ SNARE n = 38/3, + WOnly n = 34/3;  $p=0.7383$  (all groups). **e** Absolute EPSC amplitudes. Control n = 21/6, cDKO n = 25/8, +WT n = 27/6, +FA n = 18/5, + $\Delta$ PB n = 13/4, + $\Delta$ SNARE n = 8/4, +WOnly n = 10/3;  $p=0.06294$  (all groups). **f** EPSC amplitude measured 90 seconds after STP protocol (5 pulses at 10Hz) normalized to initial EPSC amplitude (1<sup>st</sup> pulse 10Hz train). Control n = 21/6, cDKO n = 23/8, +WT n = 26/6, +FA n = 16/5, + $\Delta$ PB n = 12/4, + $\Delta$ SNARE n = 6/3, +WOnly n = 10/3;  $p=0.06294$  (all groups).

N = cells/independent cultures. In **b-f**, boxplots display median (center), upper and lower quartiles (box bounds) and whiskers to the last datapoint within 1.5x interquartile range. A one-way ANOVA tested the significance of adding experimental group as a predictor, see Supplementary Table 1. For post-hoc comparison, p-value thresholds (\* $<0.05$ ; \*\* $<0.01$ ; \*\*\* $<0.001$ ) were adjusted with a Bonferroni correction ( $\alpha$ /number of tests). Abbreviations: n.s. (not significant). Source data are provided as a Source Data file.

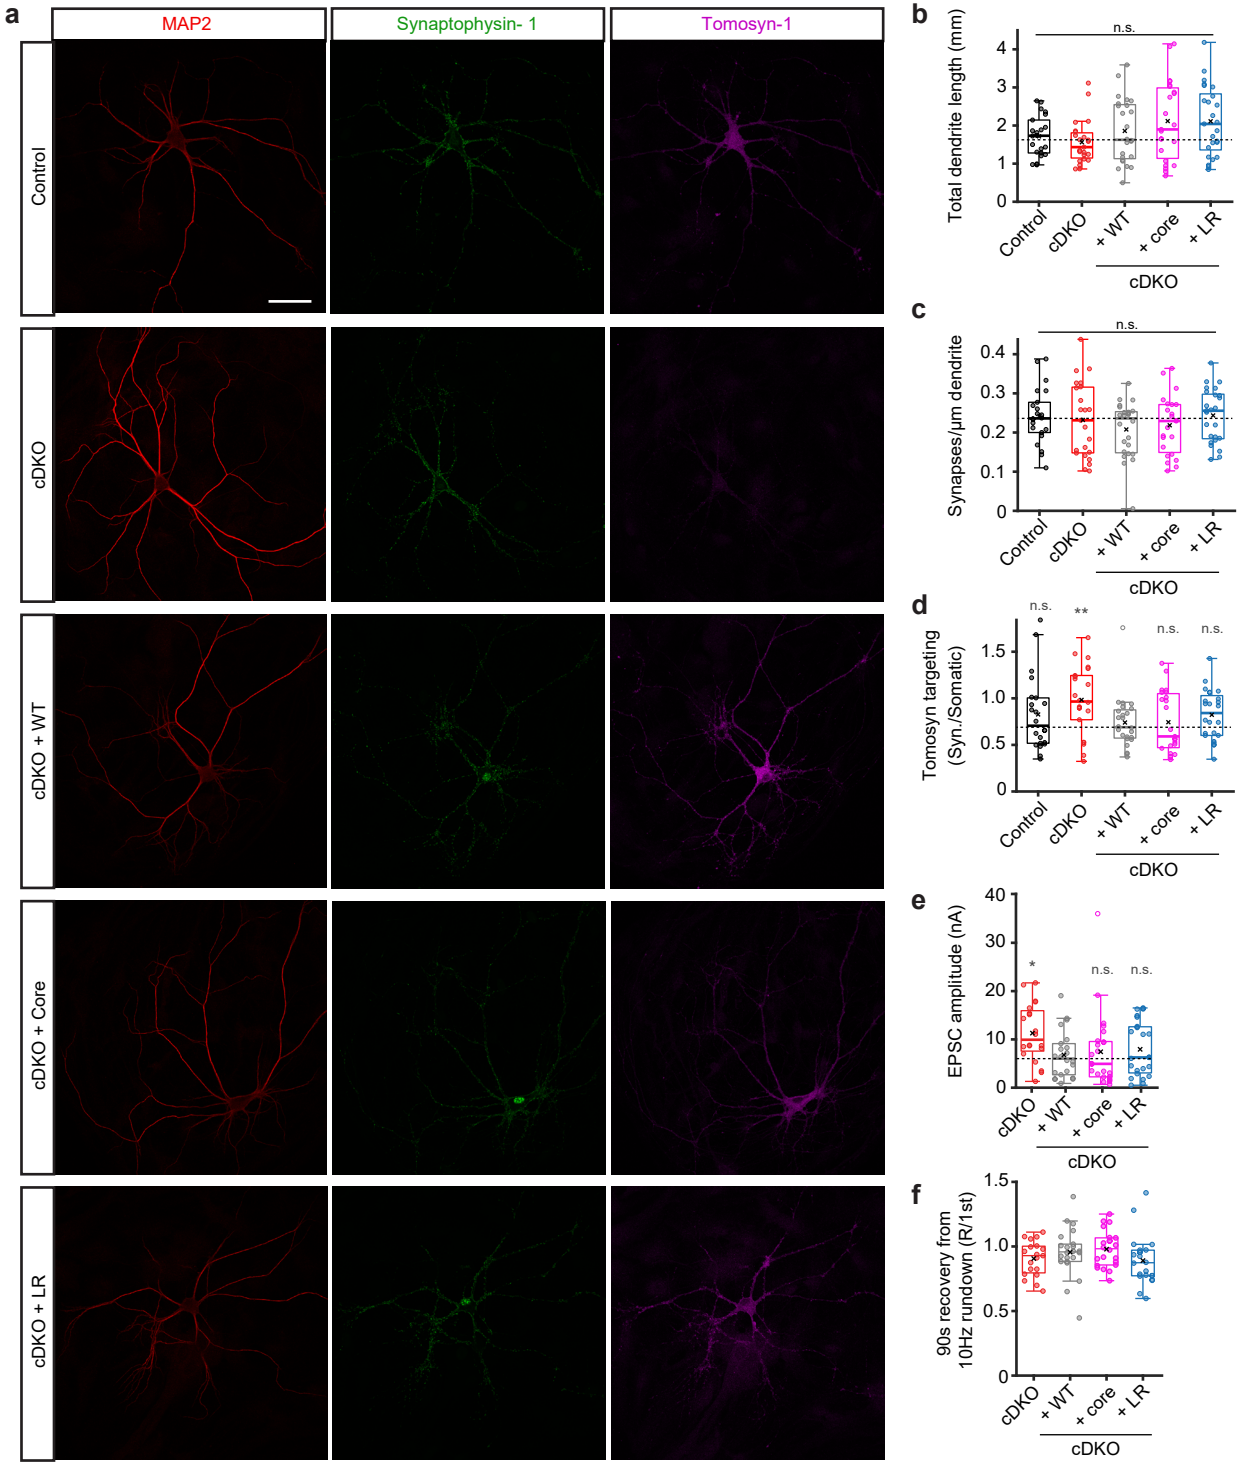



Supplementary Figure 12. **The partial SNARE-hybrid constructs support neuronal morphology.** **a-d** Morphological analysis of neurons infected with different mutant constructs (see Fig. 7). **a** Example images of autaptic hippocampal neurons immunostained for MAP2, synaptophysin-1, and tomosyn-1. Scale bar = 50  $\mu$ m. Control n = 22/4, cDKO n = 23/4, + WT n = 24/4, + Core n = 23/4, + LR n = 25/4. **b** Total dendrite length as derived from the MAP2 mask;  $p=0.0553$  (all groups). **c** Synapse density as derived from the synaptophysin-1-positive puncta within the MAP2 mask;  $p=0.4820$  (all groups). **d** The ratio of the tomosyn-1 signal intensity in synapses to the signal in the soma was calculated to demonstrate synaptic targeting;  $p=0.013$  (all groups). Post hoc comparisons against +WT:  $p=0.1836$  (control);  $**p=0.00025$  (cDKO),  $p=0.6171$  (+Core),  $p=0.03678$  (+LR). **e** Absolute EPSC amplitudes cDKO. n = 20/4, + WT n = 22/4, + Core n = 24/4, + LR n = 23/4;  $p=0.0054$ . Post hoc comparisons against +WT:  $*p=0.0051$  (cDKO),  $p=0.9399$  (+Core),  $p=0.3096$  (+LR). **f** EPSC amplitude measured 90 seconds after STP protocol (5 pulses at 10Hz) normalized to initial EPSC amplitude (1<sup>st</sup> pulse 10Hz train). cDKO n = 19/4, + WT n = 22/4, + Core n = 22/4, + LR n = 22/4. N = cells/independent cultures. In **b-f**, boxplots display median (center), upper and lower quartiles (box bounds) and whiskers to the last datapoint within 1.5x interquartile range. A one-way ANOVA tested the significance of adding experimental group as a predictor, see Supplementary Table 1. For post-hoc comparison, p-value thresholds ( $*<0.05$ ;  $**<0.01$ ;  $***<0.001$ ) were adjusted with a Bonferroni correction ( $\alpha$ /number of tests). Abbreviations: n.s. (not significant). Source data are provided as a Source Data file.

| PARAMETER                              | GROUP           | (N/n)        | MEAN±SD                       | OUTLIER | ANOVA BETWEEN MODELS          | POSTHOC ANOVA ON SUBSETS                                                                                     |
|----------------------------------------|-----------------|--------------|-------------------------------|---------|-------------------------------|--------------------------------------------------------------------------------------------------------------|
| SUPPLEMENTAL FIGURE 1                  |                 |              |                               |         |                               |                                                                                                              |
| Synaptic tom-1 intensity (a.u.)        | Control<br>cDKO | 2/31<br>2/30 | 1399 ± 334<br>424 ± 129       | 0<br>0  | F(1,58) = 231.1, p<0.0001 *** |                                                                                                              |
| Dendrite length (mm)                   | Control<br>cDKO | 4/62<br>4/57 | 1764 ± 944<br>1605 ± 889      | 0<br>0  | F(1,114) = 1.107, p=0.295     |                                                                                                              |
| Synapses/μm                            | Control<br>cDKO | 4/62<br>4/57 | 0.27 ± 0.1<br>0.28 ± 0.09     | 1<br>0  | F(1,113) = 1.636, p=0.2035    |                                                                                                              |
| Neurite length (mm), DIV7              | Control<br>cDKO | 1/13<br>1/14 | 1048 ± 569<br>1110 ± 471      | 0<br>0  | F(3,60) = 11.54, p<0.0001 *** | WT-DIV7 vs cDKO-DIV7: F(1,25) = 0.0931, p= 0.7628<br>WT-DIV7 vs WT-DIV15: F(1,30) = 18.26, p= 0.0002***      |
| Neurite length (mm), DIV15             | Control<br>cDKO | 1/19<br>1/18 | 2432 ± 1065<br>2136 ± 899     | 0<br>0  |                               | WT-DIV15 vs cDKO-DIV15: F(1,35) = 0.8302, p= 0.3685<br>cDKO-DIV7 vs cDKO-DIV15: F(1,30) = 14.96, p= 0.0005** |
| Synapses/μm, DIV7                      | Control<br>cDKO | 1/13<br>1/14 | 0.11 ± 0.05<br>0.11 ± 0.05    | 0<br>0  | F(3,59) = 55.81, p<0.0001 *** | WT-DIV7 vs cDKO-DIV7: F(1,25) = 0.0208, p=0.8865<br>WT-DIV7 vs WT-DIV15: F(1,29) = 67.93, p<0.0001 ***       |
| Synapses/μm, DIV15                     | Control<br>cDKO | 1/19<br>1/18 | 0.33 ± 0.14<br>0.32 ± 0.07    | 1<br>0  |                               | WT-DIV15 vs cDKO-DIV15: F(1,34) = 1.17, p= 0.2869<br>cDKO-DIV7 vs cDKO-DIV15: F(1,30) = 100.9, p<0.0001 ***  |
| Intensity Tom, DIV7                    | Control<br>cDKO | 1/13<br>1/14 | 1399 ± 406<br>624 ± 352       | 0<br>1  | F(3,58) = 101.7, p<0.0001 *** | WT-DIV7 vs cDKO-DIV7: F(1,24) = 55.84, p<0.0001 ***<br>WT-DIV7 vs WT-DIV15: F(1,29) = 1.806, p= 0.1895       |
| Intensity Tom, DIV15                   | Control<br>cDKO | 1/19<br>1/18 | 1499 ± 268<br>412 ± 161       | 1<br>0  |                               | WT-DIV15 vs cDKO-DIV15: F(1,34) = 381, p<0.0001 ***<br>cDKO-DIV7 vs cDKO-DIV15: F(1,29) = 5.912, p= 0.0215   |
| FIGURE 1 + SUPPLEMENTAL FIGURE 2       |                 |              |                               |         |                               |                                                                                                              |
| mEPSC frequency                        | Control<br>cDKO | 6/47<br>6/44 | 6.54 ± 6.54<br>27.11 ± 13.87  | 1<br>0  | F(1,83) = 111.7, p<0.0001 *** |                                                                                                              |
| mEPSC amplitude                        | Control<br>cDKO | 6/47<br>6/44 | 31.16 ± 5.85<br>32.84 ± 5.68  | 1<br>0  | F(1,83) = 3.075, p=0.0832     |                                                                                                              |
| EPSC amplitude (nA)                    | Control<br>cDKO | 6/50<br>6/49 | 8.4 ± 6.8<br>12.2 ± 5.3       | 1<br>0  | F(1,91) = 16.44, p<0.0001 *** |                                                                                                              |
| EPSC charge (pC)                       | Control<br>cDKO | 6/50<br>6/49 | 124 ± 145<br>194 ± 121        | 1<br>1  | F(1,90) = 14.63, p=0.0002 *** |                                                                                                              |
| EPSC rise time (ms)                    | Control<br>cDKO | 6/44<br>6/49 | 1.68 ± 0.64<br>0.64 ± 0.47    | 2<br>1  | F(1,83) = 0.137, p=0.7124     |                                                                                                              |
| EPSC decay time (ms)                   | Control<br>cDKO | 6/44<br>6/49 | 6.92 ± 2.81<br>7.67 ± 2.56    | 1<br>0  | F(1,85) = 3.627, p=0.0602     |                                                                                                              |
| EPSC half-width (ms)                   | Control<br>cDKO | 6/44<br>6/49 | 9.46 ± 2.96<br>10.22 ± 3.06   | 1<br>0  | F(1,83) = 2.929, p=0.0907     |                                                                                                              |
| PAIRED PULSE RATIO (#2/#1)             |                 |              |                               |         |                               |                                                                                                              |
| 20 ms IPI                              | Control<br>cDKO | 6/45<br>6/47 | 0.95 ± 0.35<br>0.71 ± 0.23    | 1<br>1  | F(1,83) = 17.25, p<0.0001 *** |                                                                                                              |
| 50 ms IPI                              | Control<br>cDKO | 6/37<br>6/42 | 1.11 ± 0.41<br>0.74 ± 0.20    | 1<br>1  | F(1,70) = 27.70, p<0.0001***  |                                                                                                              |
| 100 ms IPI                             | Control<br>cDKO | 6/39<br>6/44 | 1.04 ± 0.33<br>0.75 ± 0.17    | 0<br>0  | F(1,76) = 22.77, p<0.0001***  |                                                                                                              |
| 200 ms IPI                             | Control<br>cDKO | 6/47<br>6/47 | 0.95 ± 0.19<br>0.74 ± 0.14    | 1<br>0  | F(1,86) = 37.86, p<0.0001***  |                                                                                                              |
| SHORT-TERM PLASTICITY (#5/#1)          |                 |              |                               |         |                               |                                                                                                              |
| 5 Hz train                             | Control<br>cDKO | 6/47<br>6/47 | 0.90 ± 0.36<br>0.50 ± 0.15    | 1<br>0  | F(1,86) = 69.15, p<0.0001***  |                                                                                                              |
| 10 Hz train                            | Control<br>cDKO | 6/39<br>6/44 | 0.85 ± 0.43<br>0.44 ± 0.16    | 1<br>0  | F(1,75) = 32.54, p<0.0001***  |                                                                                                              |
| 20 Hz train                            | Control<br>cDKO | 6/39<br>6/42 | 0.74 ± 0.37<br>0.38 ± 0.20    | 1<br>1  | F(1,70) = 35.16, p<0.0001***  |                                                                                                              |
| SUPPLEMENTAL FIGURE 3                  |                 |              |                               |         |                               |                                                                                                              |
| mEPSC frequency                        | Control<br>cDKO | 4/21<br>4/21 | 5.35 ± 6.77<br>37.39 ± 19.02  | 1<br>0  | F(1,34) = 51.05, p<0.0001 *** |                                                                                                              |
| mEPSC amplitude                        | Control<br>cDKO | 4/21<br>4/21 | 20.55 ± 8.83<br>24.41 ± 15.39 | 1<br>1  | F(1,33) = 1.21, p=0.2802      |                                                                                                              |
| EPSC amplitude                         | Control<br>cDKO | 5/23<br>5/23 | 8.73 ± 4.25<br>10.82 ± 5.67   | 0<br>0  | F(1,40) = 2.19, p=0.1463      |                                                                                                              |
| 5Hz STP (#5/#1)                        | Control<br>cDKO | 5/23<br>5/23 | 0.62 ± 0.17<br>0.40 ± 0.10    | 1<br>0  | F(1,39) = 30.60, p<0.0001 *** |                                                                                                              |
| SUPPLEMENTAL FIGURE 4                  |                 |              |                               |         |                               |                                                                                                              |
| PPR (#2/#1), 50 ms IPI                 |                 |              |                               |         |                               |                                                                                                              |
| 1mM [Ca <sup>2+</sup> ] <sub>e</sub>   | Control<br>cDKO | 4/13<br>4/14 | 1.57 ± 0.54<br>1.12 ± 0.14    | 0<br>0  | F(1,22) = 9.620, p= 0.0052**  |                                                                                                              |
| 1.5mM [Ca <sup>2+</sup> ] <sub>e</sub> | Control<br>cDKO | 4/9<br>4/14  | 1.18 ± 0.33<br>0.85 ± 0.16    | 0<br>0  | F(1,18) = 8.703, p=0.0086**   |                                                                                                              |
| 2mM [Ca <sup>2+</sup> ] <sub>e</sub>   | Control<br>cDKO | 4/13<br>4/14 | 0.98 ± 0.20<br>0.72 ± 0.08    | 0<br>0  | F(1,22) = 20.34, p= 0.0002*** |                                                                                                              |
| 4mM [Ca <sup>2+</sup> ] <sub>e</sub>   | Control<br>cDKO | 4/9<br>4/11  | 0.74 ± 0.14<br>0.56 ± 0.07    | 0<br>0  | F(1,15) = 12.79, p=0.0028**   |                                                                                                              |
| 8mM [Ca <sup>2+</sup> ] <sub>e</sub>   | Control<br>cDKO | 4/9<br>4/10  | 0.63 ± 0.1<br>0.51 ± 0.08     | 0<br>0  | F(1,14) = 5.932, p=0.0288*    |                                                                                                              |
| Normalized EPSC amp. (to 2mM)          |                 |              |                               |         |                               |                                                                                                              |
| KD Ca <sup>2+</sup> (mM)               | Control<br>cDKO | 4/9<br>4/11  | 1.61 ± 0.35<br>1.27 ± 0.2     | 0<br>0  | F(1,15) = 6.865, p= 0.0193*   |                                                                                                              |
| Hill coefficient (c)                   | Control<br>cDKO | 4/9<br>4/11  | 3.02 ± 0.57<br>2.87 ± 0.45    | 0<br>0  | F(1,15) = 0.082, p=0.7792     |                                                                                                              |
| FIGURE 2 + SUPPLEMENTAL FIGURE 5       |                 |              |                               |         |                               |                                                                                                              |
| RRP size (nC) - manual                 | Control<br>cDKO | 6/25<br>6/26 | 2.45 ± 1.26<br>2.15 ± 1.59    | 0<br>0  | F(1,43) = 1.778, p=0.1894     |                                                                                                              |
| Pves (EPSC/RRP) - manual               | Control<br>cDKO | 6/24<br>6/25 | 0.04 ± 0.03<br>0.07 ± 0.06    | 0<br>0  | F(1,42) = 6.626, p=0.0137*    |                                                                                                              |
| 250/500mM - manual                     | Control<br>cDKO | 6/25<br>6/26 | 0.45 ± 0.21<br>0.85 ± 0.24    | 0<br>0  | F(1,43) = 42.13, p<0.0001***  |                                                                                                              |
| Refilled pool (% of initial)           | Control<br>cDKO | 6/19<br>6/20 | 0.79 ± 0.07<br>0.80 ± 0.09    | 0<br>0  | F(1,32) = 0.230, p= 0.6347    |                                                                                                              |
| RRP size (nC) – fitted                 | Control<br>cDKO | 6/16<br>6/18 | 1.99 ± 1.02<br>1.33 ± 0.91    | 0<br>0  | F(1,27) = 0.687, p=0.4144     |                                                                                                              |
| Pves (EPSC/RRP) – fitted               | Control<br>cDKO | 6/15<br>6/15 | 0.05 ± 0.04<br>0.10 ± 0.06    | 0<br>0  | F(1,23) = 2.080, p=0.1627     |                                                                                                              |
| 250/500mM - fitted                     | Control         | 6/10         | 0.55 ± 0.09                   | 0       | F(1,19) = 129.3, p<0.0001***  |                                                                                                              |

|                                               |                  |       |                  |   |                                    |                                                                     |
|-----------------------------------------------|------------------|-------|------------------|---|------------------------------------|---------------------------------------------------------------------|
|                                               | cDKO             | 6/15  | 0.92 ± 0.06      | 0 |                                    |                                                                     |
| $K_{2,max}(s^{-1})$                           |                  |       |                  |   |                                    |                                                                     |
| 0mM HS                                        | Control          | 6/13  | 0.0001 ± 0.00008 | 0 | F(1,14) = 6.366, p= 0.02436*       |                                                                     |
|                                               | cDKO             | 6/7   | 0.0013 ± 0.0010  | 0 |                                    |                                                                     |
| 250mM HS                                      | Control          | 6/12  | 0.43 ± 0.81      | 0 | F(1,22) = 21.34, p=0.0001***       |                                                                     |
|                                               | cDKO             | 6/17  | 0.80 ± 0.42      | 1 |                                    |                                                                     |
| 500mM HS                                      | Control          | 6/16  | 3.02 ± 3.53      | 0 | F(1,26) = 41.96, p<0.0001***       |                                                                     |
|                                               | cDKO             | 6/18  | 5.13 ± 1.19      | 0 |                                    |                                                                     |
| $\Delta E_a(RT)$                              |                  |       |                  |   |                                    |                                                                     |
| 0mM HS                                        | Control          | 6/13  | 0.00 ± 0.98      | 0 | F(1,14) = 21.03, p= 0.0004***      |                                                                     |
|                                               | cDKO             | 6/7   | -2.43 ± 0.68     | 0 |                                    |                                                                     |
| 250mM HS                                      | Control          | 6/12  | -7.84 ± 0.85     | 0 | F(1,23) = 21.36, p= 0.0001***      |                                                                     |
|                                               | cDKO             | 6/17  | -8.95 ± 0.44     | 0 |                                    |                                                                     |
| 500mM HS                                      | Control          | 6/16  | -10.1 ± 0.63     | 0 | F(1,26) = 48.63, p< 0.0001***      |                                                                     |
|                                               | cDKO             | 6/18  | -10.9 ± 0.24     | 1 |                                    |                                                                     |
| Priming rate $K_i(s^{-1})$                    | Control          | 6/16  | 0.17 ± 0.20      | 1 | F(1,24) = 3.768, p=0.06409         |                                                                     |
|                                               | cDKO             | 6/16  | 0.07 ± 0.14      | 0 |                                    |                                                                     |
| Unpriming rate $K_{-i}(s^{-1})$               | Control          | 6/16  | 0.07 ± 0.07      | 1 | F(1,24) = 3.959, p=0.05814         |                                                                     |
|                                               | cDKO             | 6/16  | 0.04 ± 0.06      | 0 |                                    |                                                                     |
| SYNAPTIC RECOVERY AFTER TRAIN STIMULATION     |                  |       |                  |   |                                    |                                                                     |
| 40Hz train                                    |                  |       |                  |   |                                    |                                                                     |
| Norm. EPSC – R1                               | Control          | 6/33  | 1.00 ± 0.31      | 0 | F(1,64) = 53.49, p<0.0001***       |                                                                     |
|                                               | cDKO             | 6/38  | 0.59 ± 0.13      | 0 |                                    |                                                                     |
| Norm. EPSC – R2                               | Control          | 6/31  | 0.95 ± 0.21      | 0 | F(1,59) = 1.732, p=0.1933          |                                                                     |
|                                               | cDKO             | 6/35  | 0.90 ± 0.14      | 0 |                                    |                                                                     |
| 1 <sup>st</sup> EPSC (nA)                     | Control          | 6/33  | 6.95 ± 4.85      | 1 | F(1,62) = 7.586, p<0.007711**      |                                                                     |
|                                               | cDKO             | 6/38  | 9.51 ± 5.08      | 1 |                                    |                                                                     |
| R1 EPSC (nA)                                  | Control          | 6/33  | 6.38 ± 4.42      | 1 | F(1,62) = 0.485, p=0.4889          |                                                                     |
|                                               | cDKO             | 6/38  | 5.57 ± 2.94      | 1 |                                    |                                                                     |
| R2 EPSC (nA)                                  | Control          | 6/31  | 6.36 ± 4.89      | 1 | F(1,57) = 4.858, p=0.03157*        |                                                                     |
|                                               | cDKO             | 6/35  | 8.14 ± 4.54      | 1 |                                    |                                                                     |
| RRP size (nC)                                 | Control          | 6/33  | 0.78 ± 0.51      | 0 | F(1,63) = 2.642, p=0.109           |                                                                     |
|                                               | cDKO             | 6/38  | 0.61 ± 0.46      | 1 |                                    |                                                                     |
| Refilling rate (nC/s)                         | Control          | 6/33  | 1.05 ± 1.00      | 1 | F(1,61) = 2.214, p=0.1419          |                                                                     |
|                                               | cDKO             | 6/38  | 0.83 ± 0.61      | 2 |                                    |                                                                     |
| FITTED PARAMETERS RECOVERY 500mM HS           |                  |       |                  |   |                                    |                                                                     |
| $K_{2,max}(s^{-1})$                           | Control          | 6/12  | 2.06 ± 1.31      | 0 | F(1,16) = 0.738, p= 0.403          |                                                                     |
|                                               | cDKO             | 6/11  | 2.52 ± 1.10      | 0 |                                    |                                                                     |
| $\Delta E_a(RT)$                              | Control          | 6/12  | -9.83 ± 0.64     | 0 | F(1,16) = 0.691, p=0.4182          |                                                                     |
|                                               | cDKO             | 6/11  | -10.03 ± 0.72    | 0 |                                    |                                                                     |
| SUPPLEMENTAL FIGURE 6                         |                  |       |                  |   |                                    |                                                                     |
| Micro-network<br>Docked SVs ( $\mu$ m)        | Control          | 4/132 | 8.11 ± 3.78      | 2 | L ratio (2,339) = 7.153, p=0.2044  | Control-cDKO: p=0.0424<br>Control-WT: p=0.0153*<br>cDKO-WT: p=0.804 |
|                                               | cDKO             | 4/89  | 6.57 ± 3.45      | 1 |                                    |                                                                     |
|                                               | +WT              | 4/128 | 6.87 ± 4.57      | 2 |                                    |                                                                     |
| Micro-network<br>AZ length ( $\mu$ m)         | Control          | 4/132 | 623 ± 271        | 2 | L ratio (2,335) = 3.176, p=0.2044  |                                                                     |
|                                               | cDKO             | 4/89  | 580 ± 308        | 4 |                                    |                                                                     |
|                                               | +WT              | 4/128 | 643 ± 285        | 3 |                                    |                                                                     |
| Micro-network<br>Total SV number              | Control          | 4/132 | 154 ± 96         | 4 | L ratio (2,335) = 2.344, p=0.3097  |                                                                     |
|                                               | cDKO             | 4/89  | 134 ± 92         | 3 |                                    |                                                                     |
|                                               | +WT              | 4/128 | 143 ± 99         | 2 |                                    |                                                                     |
| Micro-network<br>Contacting SVs<br>outside AZ | Control          | 4/132 | 0.42 ± 1.04      | 2 | L ratio (2, 339) = 3.118, p=0.2103 |                                                                     |
|                                               | cDKO             | 4/89  | 0.20 ± 0.65      | 1 |                                    |                                                                     |
|                                               | +WT              | 4/128 | 0.16 ± 0.57      | 2 |                                    |                                                                     |
| FIGURE 3 + SUPPLEMENTAL FIGURE 7              |                  |       |                  |   |                                    |                                                                     |
| EPSC amp. (nA)                                | cDKO             | 4/17  | 9.73 ± 5.33      | 0 | F(2,52) = 7.508, p=0.001366**      | vsWT: F(1,32) = 12.30, p=0.001366**                                 |
|                                               | +WT              | 4/21  | 5.03 ± 6.13      | 1 |                                    |                                                                     |
|                                               | +Hybrid          | 4/21  | 10.75 ± 7.33     | 0 |                                    | vsWT: F(1,36) = 11.87, p=0.001468**                                 |
| STP (5 <sup>th</sup> /1 <sup>st</sup> )       | cDKO             | 4/17  | 0.35 ± 0.15      | 0 | F(2,53) = 15.08, p<0.0001***       | vsWT: F(1,33) = 25.50, p<0.0001***                                  |
|                                               | +WT              | 4/21  | 0.93 ± 0.47      | 0 |                                    |                                                                     |
|                                               | +Hybrid          | 4/21  | 0.54 ± 0.27      | 0 |                                    | vsWT: F(1,37) = 10.76, p=0.002262**                                 |
| EPSC recovery                                 | cDKO             | 4/14  | 0.51 ± 0.10      | 0 | F(2,46) = 28.71, p<0.0001***       | vsWT: F(1,29) = 36.20, p<0.0001***                                  |
|                                               | +WT              | 4/20  | 1.48 ± 0.67      | 0 |                                    |                                                                     |
|                                               | +Hybrid          | 4/18  | 0.65 ± 0.23      | 0 |                                    | vsWT: F(1,33) = 30.10, p<0.0001***                                  |
| Norm. synaptic tom-1                          | Control          | 3/35  | 1.00 ± 0.26      | 0 | F(3,125) = 50.52, p<0.0001***      | vsWT: F(1,63) = 0.749, p=0.3902                                     |
|                                               | cDKO             | 3/30  | 0.35 ± 0.16      | 0 |                                    | vsWT: F(1,58) = 50.52, p<0.0001***                                  |
|                                               | +WT              | 3/33  | 1.12 ± 0.48      | 1 |                                    |                                                                     |
|                                               | +hybrid          | 3/35  | 1.69 ± 0.88      | 1 |                                    | vsWT: F(1,62) = 15.89, p=0.0001797***                               |
| Synaptic / somatic<br>tomosyn                 | Control          | 3/35  | 0.66 ± 0.40      | 0 | F(3,124) = 22.94, p<0.0001***      | vsWT: F(1,63) = 1.123, p=0.2934                                     |
|                                               | cDKO             | 3/30  | 1.04 ± 0.44      | 0 |                                    | vsWT: F(1,58) = 45.35, p<0.0001***                                  |
|                                               | +WT              | 3/33  | 0.60 ± 0.25      | 1 |                                    |                                                                     |
|                                               | +hybrid          | 3/35  | 0.65 ± 0.27      | 1 |                                    | vsWT: F(1,63) = 0.805, p=0.373                                      |
| Total dendrite length<br>(mm)                 | Control          | 3/35  | 2.36 ± 1.07      | 0 | F(3,127) = 6.009, p=0.0007***      | vsWT: F(1,64) = 3.602, p=0.06222                                    |
|                                               | cDKO             | 3/30  | 1.72 ± 0.69      | 0 |                                    | vsWT: F(1,59) = 3.118, p= 0.0826                                    |
|                                               | +WT              | 3/33  | 2.05 ± 0.87      | 0 |                                    |                                                                     |
|                                               | +hybrid          | 3/35  | 2.45 ± 1.17      | 0 |                                    | vsWT: F(1,64) = 4.617, p= 0.03544                                   |
| Synapses/ $\mu$ m dendrite                    | Control          | 3/35  | 0.28 ± 0.09      | 0 | F(3,127) = 1.237, p= 0.2991        |                                                                     |
|                                               | cDKO             | 3/30  | 0.26 ± 0.08      | 0 |                                    |                                                                     |
|                                               | +WT              | 3/33  | 0.30 ± 0.09      | 0 |                                    |                                                                     |
|                                               | +hybrid          | 3/35  | 0.30 ± 0.10      | 0 |                                    |                                                                     |
| FIGURE 7 + SUPPLEMENTAL FIGURE 11             |                  |       |                  |   |                                    |                                                                     |
| EPSC amp. (nA)                                | Control          | 6/21  | 7.23 ± 4.90      | 0 | F(6,106) = 2.069, p=0.06294        |                                                                     |
|                                               | cDKO             | 8/25  | 9.89 ± 6.77      | 1 |                                    |                                                                     |
|                                               | +WT              | 6/27  | 4.69 ± 4.22      | 1 |                                    |                                                                     |
|                                               | +FA              | 5/18  | 8.81 ± 6.61      | 0 |                                    |                                                                     |
|                                               | + $\Delta$ PB    | 4/13  | 9.20 ± 5.68      | 0 |                                    |                                                                     |
|                                               | + $\Delta$ SNARE | 4/8   | 7.08 ± 5.46      | 0 |                                    |                                                                     |
|                                               | +WDonly          | 3/10  | 8.07 ± 4.83      | 0 |                                    |                                                                     |
| STP (5 <sup>th</sup> /1 <sup>st</sup> )       | Control          | 6/21  | 0.78 ± 0.41      | 0 | F(6,108) = 13.21, p<0.0001***      | vsKO: F(1,37) = 19.35, p=0.00011***                                 |
|                                               | cDKO             | 8/25  | 0.44 ± 0.16      | 0 |                                    |                                                                     |
|                                               | +WT              | 6/27  | 1.25 ± 0.72      | 0 |                                    | vsKO: F(1,43) = 26.30, p<0.0001***                                  |
|                                               | +FA              | 5/18  | 0.50 ± 0.14      | 0 |                                    | vsKO: F(1,34) = 1.102, p=0.3013                                     |
|                                               | + $\Delta$ PB    | 4/13  | 0.37 ± 0.08      | 0 |                                    | vsKO: F(1,29) = 0.024, p= 0.8781                                    |

|                                         |         |      |              |   |                                |                                                                         |
|-----------------------------------------|---------|------|--------------|---|--------------------------------|-------------------------------------------------------------------------|
|                                         | +ΔSNARE | 4/8  | 0.44 ± 0.20  | 0 |                                | vsKO: F(1,24) = 0.078, p= 0.7821                                        |
|                                         | +WDonly | 3/10 | 0.41 ± 0.16  | 0 |                                | vsKO: F(1,26) = 1.331, p=0.2592                                         |
| EPSC recovery                           | Control | 6/21 | 0.94 ± 0.36  | 0 | F(6,96) = 16.18, p<0.0001 ***  | vsKO: F(1,34) = 30.28, p=0.00011****                                    |
|                                         | cDKO    | 8/22 | 0.53 ± 0.16  | 0 |                                |                                                                         |
|                                         | +WT     | 6/25 | 1.49 ± 0.79  | 1 |                                |                                                                         |
|                                         | +FA     | 5/16 | 0.69 ± 0.24  | 0 |                                |                                                                         |
|                                         | +ΔPB    | 4/12 | 0.52 ± 0.15  | 0 |                                |                                                                         |
|                                         | +ΔSNARE | 3/6  | 0.56 ± 0.15  | 0 |                                |                                                                         |
|                                         | +WDonly | 2/9  | 0.52 ± 0.14  | 0 |                                |                                                                         |
| Norm. synaptic tom-1 levels             | Control | 3/27 | 1.00 ± 0.29  | 1 | F(6,206) = 25.82, p<0.0001 *** | vsWT: F(1,51) = 1.909, p=0.1731; vsKO: F(1,49) = 285, p<0.0001****      |
|                                         | cDKO    | 3/27 | 0.22 ± 0.05  | 0 |                                |                                                                         |
|                                         | +WT     | 3/29 | 1.13 ± 0.85  | 0 |                                |                                                                         |
|                                         | +FA     | 3/34 | 0.56 ± 0.40  | 1 |                                |                                                                         |
|                                         | +ΔPB    | 3/31 | 1.48 ± 1.03  | 0 |                                |                                                                         |
|                                         | +ΔSNARE | 3/38 | 0.42 ± 0.21  | 1 |                                |                                                                         |
|                                         | +WDonly | 3/34 | 0.64 ± 0.30  | 1 |                                |                                                                         |
| Norm. somatic tom-1 levels              | Control | 3/26 | 1.00 ± 0.18  | 1 | F(6,205) = 34.03, p<0.0001 *** | vsWT: F(1,50) = 2.408, p=0.1271<br>vsWT: F(1,52) = 78.04, p<0.0001****  |
|                                         | cDKO    | 3/27 | 0.26 ± 0.11  | 0 |                                |                                                                         |
|                                         | +WT     | 3/29 | 0.90 ± 0.41  | 0 |                                |                                                                         |
|                                         | +FA     | 3/33 | 0.66 ± 0.38  | 0 |                                |                                                                         |
|                                         | +ΔPB    | 3/30 | 1.09 ± 0.22  | 0 |                                |                                                                         |
|                                         | +ΔSNARE | 3/36 | 0.68 ± 0.25  | 0 |                                |                                                                         |
|                                         | +WDonly | 3/34 | 0.96 ± 0.27  | 0 |                                |                                                                         |
| Total dendritic length (mm)             | Control | 3/27 | 1.00 ± 0.45  | 0 | F(6,210) = 2.871, p= 0.0104*   | vsWT: F(1,52) = 3.798, p= 0.05672<br>vsWT: F(1,52) = 1.387, p= 0.2442   |
|                                         | cDKO    | 3/27 | 1.11 ± 0.62  | 0 |                                |                                                                         |
|                                         | +WT     | 3/29 | 1.29 ± 0.79  | 0 |                                |                                                                         |
|                                         | +FA     | 3/34 | 1.45 ± 0.89  | 1 |                                |                                                                         |
|                                         | +ΔPB    | 3/31 | 1.58 ± 0.93  | 0 |                                |                                                                         |
|                                         | +ΔSNARE | 3/38 | 1.42 ± 0.66  | 0 |                                |                                                                         |
|                                         | +WDonly | 3/34 | 1.44 ± 0.75  | 0 |                                |                                                                         |
| Synapses/μm dendrite                    | Control | 3/27 | 0.26 ± 0.07  | 0 | F(6,211) = 0.590, p= 0.7383    |                                                                         |
|                                         | cDKO    | 3/27 | 0.25 ± 0.08  | 0 |                                |                                                                         |
|                                         | +WT     | 3/29 | 0.26 ± 0.07  | 0 |                                |                                                                         |
|                                         | +FA     | 3/34 | 0.24 ± 0.09  | 0 |                                |                                                                         |
|                                         | +ΔPB    | 3/31 | 0.23 ± 0.06  | 0 |                                |                                                                         |
|                                         | +ΔSNARE | 3/38 | 0.25 ± 0.06  | 0 |                                |                                                                         |
|                                         | +WDonly | 3/34 | 0.24 ± 0.07  | 0 |                                |                                                                         |
| FIGURE 8 + SUPPLEMENTAL FIGURE 12       |         |      |              |   |                                |                                                                         |
| EPSC amp. (nA)                          | cDKO    | 4/20 | 11.30 ± 5.99 | 0 | F(3,81) = 4.542, p=0.005406**  | vsWT: F(1,37) = 8.863, p=0.005108*                                      |
|                                         | +WT     | 4/22 | 6.78 ± 4.89  | 0 |                                |                                                                         |
|                                         | +Core   | 4/24 | 7.44 ± 7.74  | 1 |                                |                                                                         |
|                                         | +LR     | 4/23 | 7.95 ± 5.59  | 0 |                                |                                                                         |
| STP (5 <sup>th</sup> /1 <sup>st</sup> ) | cDKO    | 4/20 | 0.35 ± 0.09  | 0 | F(3,81) = 28.33, p<0.0001***   | vsWT: F(1,37) = 52.42, p<0.0001****                                     |
|                                         | +WT     | 4/22 | 0.97 ± 0.44  | 0 |                                |                                                                         |
|                                         | +Core   | 4/24 | 0.56 ± 0.17  | 0 |                                |                                                                         |
|                                         | +LR     | 4/23 | 0.58 ± 0.41  | 1 |                                |                                                                         |
| EPSC recovery                           | cDKO    | 4/19 | 0.54 ± 0.11  | 0 | F(3,77) = 15.46, p<0.0001***   | vsWT: F(1,35) = 36.88, p<0.0001****                                     |
|                                         | +WT     | 4/22 | 1.52 ± 0.98  | 1 |                                |                                                                         |
|                                         | +Core   | 4/22 | 1.00 ± 0.62  | 0 |                                |                                                                         |
|                                         | +LR     | 4/22 | 0.79 ± 0.33  | 0 |                                |                                                                         |
| Norm. synaptic tom-1 levels             | Control | 4/22 | 1.00 ± 0.28  | 0 | F(4,109) = 16.67, p<0.0001**** | vsWT: F(1,41) = 0.099, p=0.7549<br>vsWT: F(1,42) = 57.04, p<0.0001****  |
|                                         | cDKO    | 4/23 | 0.30 ± 0.12  | 0 |                                |                                                                         |
|                                         | +WT     | 4/24 | 1.04 ± 0.52  | 0 |                                |                                                                         |
|                                         | +Core   | 4/23 | 0.91 ± 0.58  | 0 |                                |                                                                         |
|                                         | +LR     | 4/25 | 1.21 ± 0.53  | 0 |                                |                                                                         |
| Synaptic / somatic tomosyn              | Control | 4/22 | 0.83 ± 0.40  | 0 | F(4,106) = 3.332, p=0.013*     | vsWT: F(1,40) = 1.831, p=0.1836<br>vsWT: F(1,40) = 16.13, p=0.0002531** |
|                                         | cDKO    | 4/23 | 0.98 ± 0.37  | 0 |                                |                                                                         |
|                                         | +WT     | 4/24 | 0.74 ± 0.28  | 1 |                                |                                                                         |
|                                         | +Core   | 4/23 | 0.74 ± 0.33  | 0 |                                |                                                                         |
|                                         | +LR     | 4/25 | 0.82 ± 0.27  | 0 |                                |                                                                         |
| Total dendritic length (mm)             | Control | 4/22 | 1.72 ± 0.53  | 0 | F(4,109) = 2.389, p=0.0553     | vsWT: F(1,41) = 0.430, p=0.5159<br>vsWT: F(1,42) = 2.220, p= 0.1437     |
|                                         | cDKO    | 4/23 | 1.56 ± 0.57  | 0 |                                |                                                                         |
|                                         | +WT     | 4/24 | 1.86 ± 0.85  | 0 |                                |                                                                         |
|                                         | +Core   | 4/23 | 2.12 ± 1.05  | 0 |                                |                                                                         |
|                                         | +LR     | 4/25 | 2.11 ± 0.91  | 0 |                                |                                                                         |
| Synapses/μm dendrite                    | Control | 4/22 | 0.24 ± 0.07  | 0 | F(4,109) = 0.874, p= 0.482     |                                                                         |
|                                         | cDKO    | 4/23 | 0.23 ± 0.10  | 0 |                                |                                                                         |
|                                         | +WT     | 4/24 | 0.21 ± 0.07  | 0 |                                |                                                                         |
|                                         | +Core   | 4/23 | 0.22 ± 0.07  | 0 |                                |                                                                         |
|                                         | +LR     | 4/25 | 0.24 ± 0.07  | 0 |                                |                                                                         |

Supplementary table 1. **Overview of statistical analyses per figure.** The results of the one-way ANOVA to test whether the more complex model (including information on the experimental group observations belong to) is significantly better at capturing the data than the simpler model. Results are reported as F(between groups df, within groups df) = [F-value], p = [p-value]. P-value thresholds = \*<0.05; \*\*<0.01; \*\*\*<0.001. For post-hoc tests, p-value thresholds were adjusted with a Bonferroni correction ( $\alpha$ /number of tests). N = independent cultures, n = neurons.
